# Supplementary material
Source: Royal Society of Chemistry journal article supplement (doi:10.1039/d6ce00317f)
Supplement: d6ce00317f1.pdf [file d6ce00317f1.pdf]

## Support information

### Co-agglomerated Crystals of CL-20 with Insensitive Nitrogen-rich Energetic Materials

Junmao Hong <sup>a,1</sup>, Jinchao Ma <sup>a,\*,1</sup>, Xinwei Huang <sup>a</sup>, Kunyou Shi <sup>a</sup>, Fang Li <sup>a</sup>, Chuan Xiao <sup>b</sup>, Hua Qian <sup>a,\*</sup>

<sup>a</sup> School of Chemistry and Chemical Engineering, Nanjing University of Science and Technology, Nanjing 210094, P.R. China

<sup>b</sup> China North Industries Corporation, Beijing 100000, P.R. China

\* Corresponding authors.

*Email address:* mjinchao@njust.edu.cn (J. Ma); qianhua@njust.edu.cn (H. Qian).

<sup>1</sup> These authors contributed equally.

#### MENU

|                            |            |
|----------------------------|------------|
| S1 Materials and methods   | S1 to S3   |
| S2 XRD analysis            | S4         |
| S3 FTIR analysis           | S5 to S8   |
| S4 Thermal analysis        | S9 to S24  |
| S5 Theoretical calculation | S25 to S29 |
| REFERENCES                 | S30 to S31 |

#### S1 Materials and methods

##### S1.1 Materials

$\epsilon$ -2,4,6,8,10,12-hexanitro-2,4,6,8,10,12-hexaazaisowurtzitane ( $\epsilon$ -CL-20) was provided by Qingyang Chemical Co., Ltd.  $\alpha$ -CL-20 was prepared by a solvent/anti-solvent (acetone/water) method according to literature.<sup>1</sup>

To prepare CL-20-based CACs, bis([1,2,4]triazolo)[1,5-b:5',1'-f][1,2,4,5]tetrazine-2,7-diamine (DATC), 4,4'-(triaz-1-ene-1,3-diyl)bis(1,2,5-oxadiazol-3-amine) (DATF) and *N*<sup>5</sup>,*N*<sup>5'</sup>-(1,2,4,5-tetrazine-3,6-diyl)-bis(1*H*-1,2,4-triazole-3,5-diamine) (BTAAT) were respectively adopted as nitrogen-rich energetic materials (NEMs).<sup>2-5</sup>

Dimethyl sulfoxide (DMSO), ethanol (EtOH) and ethyl acetate (EA) were produced by General-reagent. Trichloromethane (TCM) was produced by Sinopharm Chemical Reagent Co., Ltd. All reagents were analytic reagent.

##### S1.2 Preparation of co-agglomerated crystals (CACs)

General preparation process of CAC has been described in texts. The detailed information on the preparation of CACs, co-precipitates and physical mixtures were listed in Table S1.

As a typical preparation process of CACs, 4 g CL-20 and 1 g NEMs were blended in an adequate amount of DMSO under proper temperatures (for CL-20/DATC system: 68 mL, 90°C; for CL-20/DATF system: 30mL, room temperature; for CL-20/BTAAT system: 80 mL, 90°C). The systems were then quick poured into

water with a volume of 15 to 20 times that of DMSO. The formed suspension was stirred to sufficiently precipitate CL-20 and NEM. The obtained co-precipitates were then gently boiled in TCM (6 mL per gram of co-precipitate) for 4 hours. Finally, the systems were cooled and the CACs were obtained by filtration and drying.

Physical mixtures were prepared in the actual ratios of CL-20 and NEMs in obtained CACs by manual wet grinding in an agate mortar with EtOH (for CL-20/DATC and CL-20/BTAAT systems) or water (for CL-20/DATF system) for 15 minutes.

**Table S1 The preparation detail of CACs**

| Sample Code <sup>a</sup> | Co-formers <sup>b</sup> | Blending method <sup>c</sup> | Blending solvent system | Co-agglomeration? <sup>d</sup> |
|--------------------------|-------------------------|------------------------------|-------------------------|--------------------------------|
| 1-CP                     | CL-20/DATC              | SAS                          | DMSO/water              | No                             |
| 1-CAC                    | CL-20/DATC              | SAS                          | DMSO/water              | Yes                            |
| 1-PM                     | CL-20/DATC              | PM                           | EtOH                    | No                             |
| 2-CP                     | CL-20/DATF              | SAS                          | DMSO/water              | No                             |
| 2-CAC                    | CL-20/DATF              | SAS                          | DMSO/water              | Yes                            |
| 2-PM                     | CL-20/DATF              | PM                           | water                   | No                             |
| 3-CP                     | CL-20/BTAAT             | SAS                          | DMSO/water              | No                             |
| 3-CAC                    | CL-20/BTAAT             | SAS                          | DMSO/water              | Yes                            |
| 3-PM                     | CL-20/BTAAT             | PM                           | EtOH                    | No                             |

<sup>a</sup>Coding rules: The number before the short dash is the numerical order of different co-formers. The number after the short dash is the code for co-precipitate obtained by quickly solvent/anti-solvent methods without agglomeration process (CP), co-agglomerated crystal (CAC) or physical mixture (PM).

<sup>b</sup>The feed mass ratio of CL-20/NEMs was 4:1, i.e., 4 mass equiv CL-20 was used with 1 mass equiv NEMs.

<sup>c</sup>Code for blending method: SAS – solvent/anti-solvent method. Solutions of CL-20 and NEMs were quickly poured into anti-solvent to form co-precipitate; PM – physical mixing method. CL-20 and NEMs were put into an agate mortar and blended by manually grinding.

<sup>d</sup>Yes – Materials experienced an agglomeration process, i.e., were boiled in chloroform; No – Materials did not experience an agglomeration process.

### S1.3 Characterization method

The component proportions of CL-20 and NEMs in CACs were determined by HPLC using external standard method. The morphology of materials was investigated using scanning electron microscope (SEM, ZEISS Sigma 300). Powder X-ray diffraction (PXRD) data were recorded at room temperature by Bruker D8 Discover powder diffractometer. Fourier Transform Infrared (FTIR) spectra were obtain using Thermo NICOLETIS20 spectrometer under ATR mode.

The ratios of CL-20 and NEMs in CACs were determined using a solvent extraction method: firstly, about 0.5 g sample was precisely weighed by difference and placed into a filter cup of known mass; then an excess of appropriate saturated solution (for CL-20/DATC and CL-20/BTAAT: NEM-saturated EA solutions; for CL-20/DATF: CL-20-saturated EtOH solution) was used to wash the sample under stirring; finally, the filter cup was dried and weighed. The mass fraction was

calculated by Eq.(S1) and converted to molar ratio.

$$\omega_x = \frac{m_1 - m_2}{m_s} \quad (\text{S1})$$

where  $\omega_x$  is the mass fraction of component X in CACs (for CL-20/DATC and CL-20/BTAAT, X is CL-20; for CL-20/DATF, X is DATF);  $m_1$  is the total mass of filter cup and samples before washing, g;  $m_2$  is the total mass of filter cup and residua after washing, g;  $m_s$  is the mass of samples weighed by difference.

Densities of CACs and PMs were measured by gas pycnometer AccuPyc II 1345 at 30°C, using Helium as the analysis gas.

#### S1.4 Performance evaluation

Mechanical Sensitivities (impact and friction) were respectively determined by HWP18-30S BAM impact sensitivity tester and HWP17-10S BAM friction sensitivity tester (Hangzhou Young Instrument Science & Technology Co., Ltd.), using critical impact energy and critical friction load pressure as evaluation indexes, according to the section 13.4.2 and 13.5.1 of the UN Manual of Tests and Criteria (ST/SG/AC.10/11/Rev.7).<sup>6</sup> Mechanical sensitivity tests were conducted with a sample amount of 40 mm<sup>3</sup> for impact sensitivity and 10 mm<sup>3</sup> for friction sensitivity.

Thermal analysis was conducted by differential scanning calorimeter (Nanjing Dazhan Testing Instrument, DZ-DSC300) in 50 mL/min N<sub>2</sub> flow. A sealed stainless-steel crucible was used. Tests were conducted under heating rates of 5, 10, 15 and 20 K/min.

Detonation performance (detonation velocity and detonation pressure) was calculated using Kamlet equations (Eqs.(S2~S4)).

$$P = 1.588\rho_0^2\varphi \quad (\text{S2})$$

$$D = 1.01\varphi^{0.5}(1 + 1.3\rho_0) \quad (\text{S3})$$

$$\varphi = 0.489NM^{0.5}Q^{0.5} \quad (\text{S4})$$

where  $P$  is detonation pressure, GPa;  $\rho_0$  is density, g/cm<sup>3</sup>;  $\varphi$  is the characteristic value of explosive;  $D$  is detonation velocity, km/s;  $N$  is the number of moles of gaseous explosion products per gram of explosive, mol;  $M$  is the average molar mass of aseous explosion products;  $Q$  is the constant-volume heat of explosion of explosive, J/g, calculated by Hess' law.

## S2 XRD analysis

For  $\epsilon$ -CL-20, main diffraction peaks are at 10.70°, 12.60°, 12.80°, 13.85°, 15.80°, 16.30°, 17.70°, 20.00°, 21.55°, 22.00°, 22.30°, 22.65°, 23.65°, 24.25°, 25.80°, 27.85°, 28.40°, 28.75°, 29.60°, 29.95° and 30.35°.

For  $\alpha$ -CL-20, main diffraction peaks are at 12.21°, 13.85°, 15.10°, 17.63°, 18.10°, 19.04°, 20.28°, 25.13°, 27.69°, 28.13° and 28.99°.

For 1-CAC, main diffraction peaks are at 12.19°, 13.81°, 15.10°, 17.61°, 18.12°, 19.03°, 20.28°, 25.09°, 27.72°, 28.10° and 28.97°.

For 1-PM, main diffraction peaks are at 10.79°, 12.66°, 12.91°, 13.91°, 15.12°, 15.82°, 16.42°, 17.84°, 20.10°, 21.94°, 22.09°, 22.33°, 22.74°, 24.35°, 25.09°, 25.91°, 27.98°, 28.52°, 28.86°, 29.71°, 30.06° and 30.47°.

For DATC, main diffraction peaks are at 15.01°, 24.81° and 29.37°.

For 2-CAC, main diffraction peaks are at 12.13°, 13.45°, 13.78°, 13.96°, 15.04°, 16.57°, 17.57°, 18.04°, 19.01°, 20.24°, 25.06°, 27.00°, 27.67°, 28.04°, 28.44° and 28.93°.

For 2-PM, main diffraction peaks are at 10.80°, 12.70°, 12.94°, 13.92°, 14.14°, 15.86°, 16.47°, 16.63°, 16.73°, 17.84°, 20.07°, 22.11°, 22.42°, 25.92°, 28.00°, 28.50°, 28.55°, 28.85°, 30.09° and 30.44°.

For DATF, main diffraction peaks are at 16.13°, 16.73°, 18.23°, 20.34°, 23.48°, 25.95°, 26.98°, 28.45°, 29.03°, 29.46° and 30.88°.

For 3-CAC, main diffraction peaks are at 12.17°, 13.82°, 13.98°, 17.61°, 18.08°, 20.28°, 22.35°, 25.12°, 27.71°, 28.08°, 28.95° and 29.34°.

For 3-PM, main diffraction peaks are at 10.85°, 12.74°, 12.90°, 13.98°, 15.88°, 16.43°, 17.18°, 17.81°, 21.70°, 22.09°, 22.42°, 22.75°, 23.80°, 24.39°, 25.27°, 25.98°, 28.02°, 28.54°, 28.87°, 29.34°, 30.11° and 30.48°.

For BTAAT, main diffraction peaks are at 12.68°, 17.14°, 20.67°, 22.40°, 25.23°, 28.27° and 29.28°.

### S3 FTIR analysis

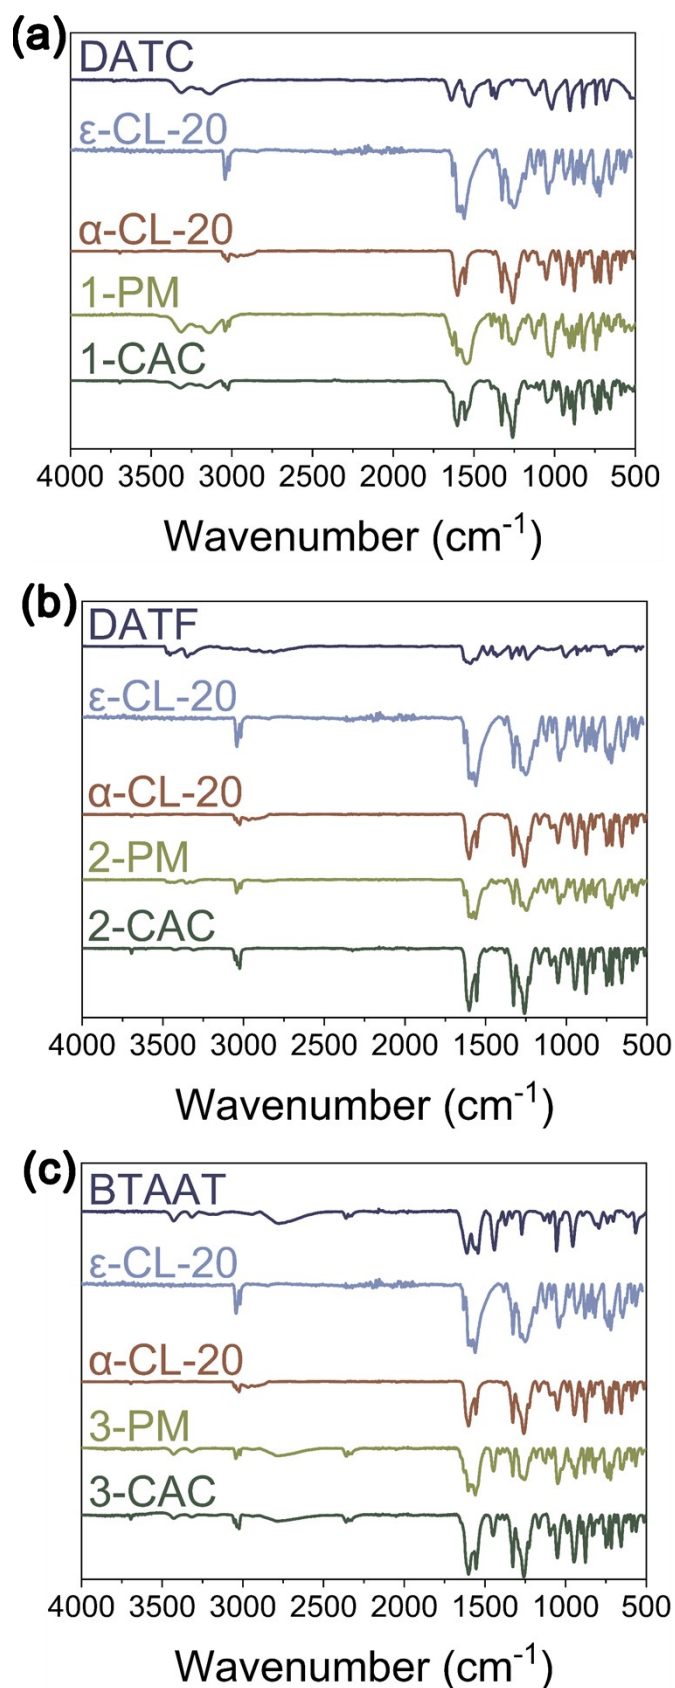

**Fig. S1** The FTIR spectra of CACs, PMs and raw materials ((a) CL-20/DATC; (b) CL-20/DATF; (c) CL-20/BTAAT)

**Table S2 Main absorption peaks and corresponding assignment of co-formers and CACs**

| Assignment <sup>a</sup>             | $\epsilon$ -CL-20                                                                   | $\alpha$ -CL-20                                                                              | DATC                                | 1-CAC                                                                         | 1-PM                                                                                                    |
|-------------------------------------|-------------------------------------------------------------------------------------|----------------------------------------------------------------------------------------------|-------------------------------------|-------------------------------------------------------------------------------|---------------------------------------------------------------------------------------------------------|
| $\nu_{\text{N-H}}$ for amino group  |                                                                                     |                                                                                              | 3312, 3213, 3140                    | 3319, 3217, 3155                                                              | 3313, 3209, 3137                                                                                        |
| $\nu_{\text{C-H}}$                  | 3042, 3017                                                                          | 3053, 3037, 3024, 2968                                                                       |                                     | 3053, 3036, 3024                                                              | 3042, 3016                                                                                              |
| $\delta_{\text{N-H}}$               |                                                                                     |                                                                                              | 1637, 1526                          |                                                                               | 1632                                                                                                    |
| $\nu_{\text{C-N}}$ for amine        | 1631, 757                                                                           | 750, 741                                                                                     | 1390, 1364, 1264                    | 740                                                                           | 1390, 1363, 743                                                                                         |
| $\nu_{\text{as}}$ for nitro groups  | 1602, 1584, 1560                                                                    | 1603, 1556                                                                                   |                                     | 1602, 1554                                                                    | 1603, 1584, 1541                                                                                        |
| $\nu_{\text{s}}$ for nitro groups   | 1382, 1278, 1250                                                                    | 1381, 1259, 1228                                                                             |                                     | 1390, 1259, 1228                                                              | 1389, 1280, 1252                                                                                        |
| $\nu_{\text{C-N}}$ for nitro groups | 1326                                                                                | 1327                                                                                         |                                     | 1327                                                                          | 1326                                                                                                    |
| $\nu_{\text{ring}}$                 | 1181, 1135, 1123, 1086, 1039, 934, 882, 854, 830, 818, 737, 720, 646, 623, 589, 565 | 1167, 1095, 1078, 1051, 989, 947, 902, 877, 835, 825, 715, 688, 656, 625, 607, 588, 563, 515 | 1124, 1018, 905, 824, 743, 678, 502 | 1165, 1124, 1095, 1045, 989, 947, 904, 877, 823, 717, 685, 656, 625, 588, 563 | 1181, 1133, 1123, 1090, 1018, 935, 907, 881, 854, 819, 721, 682, 658, 647, 623, 604, 589, 581, 565, 525 |

<sup>a</sup> $\nu$  – stretching vibration;  $\nu_{\text{as}}$  – asymmetrical stretching vibration;  $\nu_{\text{s}}$  – symmetrical stretching vibration;  $\delta$  – bending vibration.

**Table S2 (continue) Main absorption peaks and corresponding assignment of co-formers and CACs**

| <b>Assignment<sup>a</sup></b>       | <b>DATF</b>                                                      | <b>2-CAC</b>                                                                                           | <b>2-PM</b>                                                                                                                | <b>BTAAT</b>                                                 | <b>3-CAC</b>                                                                                                        | <b>3-PM</b>                                                                                                                    |
|-------------------------------------|------------------------------------------------------------------|--------------------------------------------------------------------------------------------------------|----------------------------------------------------------------------------------------------------------------------------|--------------------------------------------------------------|---------------------------------------------------------------------------------------------------------------------|--------------------------------------------------------------------------------------------------------------------------------|
| $\nu_{\text{N-H}}$ for amino group  | 3456, 3349                                                       | 3426, 3308                                                                                             | 3458, 3352                                                                                                                 | 3429, 3317                                                   | 3430, 3315                                                                                                          | 3430, 3315                                                                                                                     |
| $\nu_{\text{C-H}}$                  |                                                                  | 3053, 3038, 3024                                                                                       | 3043 3016                                                                                                                  |                                                              | 3053, 3037, 3024                                                                                                    | 3042, 3017                                                                                                                     |
| $\delta_{\text{N-H}}$               | 1592, 1557                                                       |                                                                                                        |                                                                                                                            | 1610, 1543                                                   |                                                                                                                     | 1559                                                                                                                           |
| $\nu_{\text{C-N}}$ for amine        | 1338, 1291, 1240                                                 | 739                                                                                                    | 1632                                                                                                                       | 1442, 1372, 1334,<br>1272                                    | 1448, 1408, 1379,<br>740                                                                                            | 1445, 1407, 757,<br>750, 743                                                                                                   |
| $\nu_{\text{as}}$ for nitro groups  |                                                                  | 1602, 1555                                                                                             | 1603, 1585, 1562                                                                                                           |                                                              | 1602, 1556                                                                                                          | 1604                                                                                                                           |
| $\nu_{\text{s}}$ for nitro groups   |                                                                  | 1380, 1258, 1228                                                                                       | 1383, 1281, 1248                                                                                                           |                                                              | 1259, 1228                                                                                                          | 1380, 1253                                                                                                                     |
| $\nu_{\text{C-N}}$ for nitro groups |                                                                  | 1327                                                                                                   | 1327                                                                                                                       |                                                              | 1327                                                                                                                | 1327                                                                                                                           |
| $\nu_{\text{ring}}$                 | 1127, 1002, 933,<br>911, 870, 853,<br>740, 721, 694,<br>568, 540 | 1166, 1095, 1080,<br>1051, 989, 946,<br>904, 877, 835,<br>716, 688, 656,<br>625, 608, 589,<br>563, 515 | 1182, 1136, 1124,<br>1088, 1043, 1018,<br>978, 935, 881,<br>854, 829, 818,<br>739, 721, 658,<br>648, 623, 588,<br>565, 524 | 1132, 1098, 1057,<br>956, 894, 794,<br>741, 704, 613,<br>566 | 1166, 1124, 1096,<br>1051, 989, 948,<br>902, 877, 835,<br>823, 794, 715,<br>688, 656, 625,<br>607, 588, 563,<br>515 | 1181, 1135, 1124,<br>1088, 1049, 935,<br>882, 854, 830,<br>819, 738, 721,<br>705, 659, 647,<br>624, 605, 589,<br>581, 566, 526 |

**Table S3 The actual peak intensities for amino**

| <b>Sample</b> | <b>Wavenumber of peak for amino (<math>P_A</math>) [<math>\text{cm}^{-1}</math>]</b> | <b>Transmittance for <math>P_A</math> (<math>T_A</math>) [%]</b> | <b>Transmittance for baseline at <math>P_A</math> (<math>T_B</math>) [%]</b> | <b>Actual peak intensity <math>T_B - T_A</math> [%]</b> |
|---------------|--------------------------------------------------------------------------------------|------------------------------------------------------------------|------------------------------------------------------------------------------|---------------------------------------------------------|
| DATC          | 3312.142                                                                             | 87.86835                                                         | 100.01698                                                                    | 12.14863                                                |
|               | 3136.652                                                                             | 86.65924                                                         | 99.98302                                                                     | 13.32378                                                |
| 1-CAC         | 3319.044                                                                             | 93.19613                                                         | 100.02296                                                                    | 6.82683                                                 |
|               | 3155.117                                                                             | 93.51346                                                         | 100.04244                                                                    | 6.52898                                                 |
| 1-PM          | 3313.106                                                                             | 83.21028                                                         | 98.72666                                                                     | 15.51638                                                |
|               | 3140.509                                                                             | 82.47234                                                         | 99.43973                                                                     | 16.96739                                                |
| DATF          | 3456.295                                                                             | 91.58237                                                         | 100.09423                                                                    | 8.51186                                                 |
|               | 3348.783                                                                             | 89.73016                                                         | 100.05263                                                                    | 10.32247                                                |
| 2-CAC         | 3426.079                                                                             | 96.25752                                                         | 97.85371                                                                     | 1.59619                                                 |
|               | 3308.437                                                                             | 96.11901                                                         | 97.82965                                                                     | 1.71064                                                 |
| 2-PM          | 3457.900                                                                             | 97.06784                                                         | 99.91935                                                                     | 2.85151                                                 |
|               | 3351.829                                                                             | 96.43481                                                         | 100                                                                          | 3.56519                                                 |
| BTAAT         | 3428.971                                                                             | 91.05320                                                         | 100.10187                                                                    | 9.04867                                                 |
|               | 3317.115                                                                             | 94.59167                                                         | 99.88398                                                                     | 5.29231                                                 |
| 3-CAC         | 3429.936                                                                             | 96.59734                                                         | 101.42615                                                                    | 4.82881                                                 |
|               | 3315.187                                                                             | 97.93417                                                         | 100.38625                                                                    | 2.45208                                                 |
| 3-PM          | 3429.936                                                                             | 94.23798                                                         | 100.15280                                                                    | 5.91482                                                 |
|               | 3315.187                                                                             | 96.65571                                                         | 99.86418                                                                     | 3.20847                                                 |

## S4 Thermal analysis

### S4.1 Methods

Thermal analysis of CACs and corresponding raw materials was performed from 50 to 500 °C by Differential Scanning Calorimetry (DSC, Nanjing Dazhan Testing Instrument, DZ-DSC300) at the heating rates of 5, 10, 15 and 20 K/min. Closed stainless steel crucibles were used. Sample loading mass was determined according to their thermal effect level ( $\leq 0.2$  mg for pure CL-20; about 0.3 mg for DATF, CACs and PMs; 0.5~0.6 mg for DATC and BTAAT). The kinetics and thermodynamics of decomposition were analyzed.

#### (1) Kinetics

The peak temperatures of CACs, PMs and raw materials when the heating rate is zero were calculated by Eq.(S2) <sup>7</sup>.

$$T_{pi} = T_{p0} + b\beta_i + c\beta_i^2 + d\beta_i^3 \quad (S2)$$

where  $T_{pi}$  is peak temperature under heating rate  $\beta_i$ , K;  $T_{p0}$  is peak temperatures when the heating rate is zero, K;  $\beta_i$  is heating rate, K/min.

The activation energy of CACs, PMs and raw materials was calculated using Kissinger method (Eq.(S3)) and Ozawa method (Eq.(S4)) method respectively <sup>8,9</sup>.

$$\ln \frac{\beta_i}{T_{pi}^2} = \ln \frac{A_K R}{E_{aK}} - \frac{E_{aK}}{RT_{pi}} \quad (S3)$$

$$\lg \beta_i = \lg \frac{A_O E_{aO}}{R f_O(\alpha)} - 2.315 - 0.4567 \frac{E_{aO}}{RT_{pi}} \quad (S4)$$

where  $\beta_i$  is heating rate, K/min;  $T_{pi}$  is peak temperature under heating rate  $\beta_i$ , K;  $A$  is pre-exponential factor;  $R$  is the ideal gas constant, 8.314 J/(mol·K);  $E_a$  is activation energy, J/mol;  $\alpha$  is conversion rate;  $f(\alpha)$  is the function versus conversion rate reflecting reaction mechanism.

The critical temperatures of thermal explosion of CACs, PMs and raw materials were calculated by Eq.(S5) <sup>10</sup>.

$$T_b = \frac{E_a - \sqrt{E_a^2 - 4E_a R T_{p0}}}{2R} \quad (S5)$$

where  $T_b$  is critical temperatures of thermal explosion, K;  $E_a$  is the average activation energies calculated by Kissinger method and Ozawa method, J/mol.

Moreover, Friedman (Eq.(S6)) and combined kinetic analysis (CKA) (Eq.(S7)) methods was utilized to further analyze the progress and mechanism of thermal decomposition. <sup>11-13</sup>

$$\ln \left[ \beta \frac{d\alpha}{d(T - T_0)} \right] = \ln [A_F f_F(\alpha)] - \frac{E_{aF}}{RT} \quad (S6)$$

$$\frac{d\alpha}{d(T - T_0)} = \frac{A_{CKA}}{\beta} e^{-\frac{E_{aCKA}}{RT}} f_{CKA}(\alpha) \quad (S7)$$

where  $\beta$  is heating rate, K/min;  $\alpha$  is the conversion rate at moment  $t$ ;  $T$  is the temperature at moment  $t$ , K;  $T_0$  is the temperature at  $\alpha = 0$ , K;  $A$  is pre-exponential factor;  $f(\alpha)$  is the function versus conversion rate reflecting reaction mechanism;  $E_a$  is activation energy, J/mol;  $R$  is the ideal gas constant, 8.314 J/(mol·K);

#### (2) Thermodynamics

The pre-exponential factors ( $A_K$ ) were calculated by Kissinger method using Eq.(S2). The activation enthalpy ( $\Delta H^\ddagger$ ), activation entropy ( $\Delta S^\ddagger$ ) and Gibbs free energy of activation ( $\Delta G^\ddagger$ ) were calculated by Eqs.(S8~S10) <sup>14</sup>.

$$\Delta H^\ddagger = E_{aK} - RT_{p0} \quad (\text{S8})$$

$$\Delta S^\ddagger = R \ln \frac{A_K h}{k T_{p0}} + \frac{\Delta H^\ddagger - E_{aK}}{T_{p0}} \quad (\text{S9})$$

$$\Delta G^\ddagger = \Delta H^\ddagger - T_{p0} \Delta S^\ddagger \quad (\text{S10})$$

where  $\Delta H^\ddagger$  is the activation enthalpy, J/mol;  $E_{aK}$  is the activation energy calculated by Kissinger method, J/mol;  $\Delta S^\ddagger$  is the activation entropy, J/(mol·K);  $A_K$  is pre-exponential factor calculated by Kissinger method, s<sup>-1</sup>;  $h$  is the Planck constant, 6.626×10<sup>-34</sup> J/s;  $k$  is the Boltzmann constant, 1.3806×10<sup>-23</sup> J/K;  $T_{p0}$  is the peak temperatures when the heating rate is zero, K;  $\Delta G^\ddagger$  is the Gibbs free energy of activation, J/mol.

#### S4.2 DSC curves under different heating rates

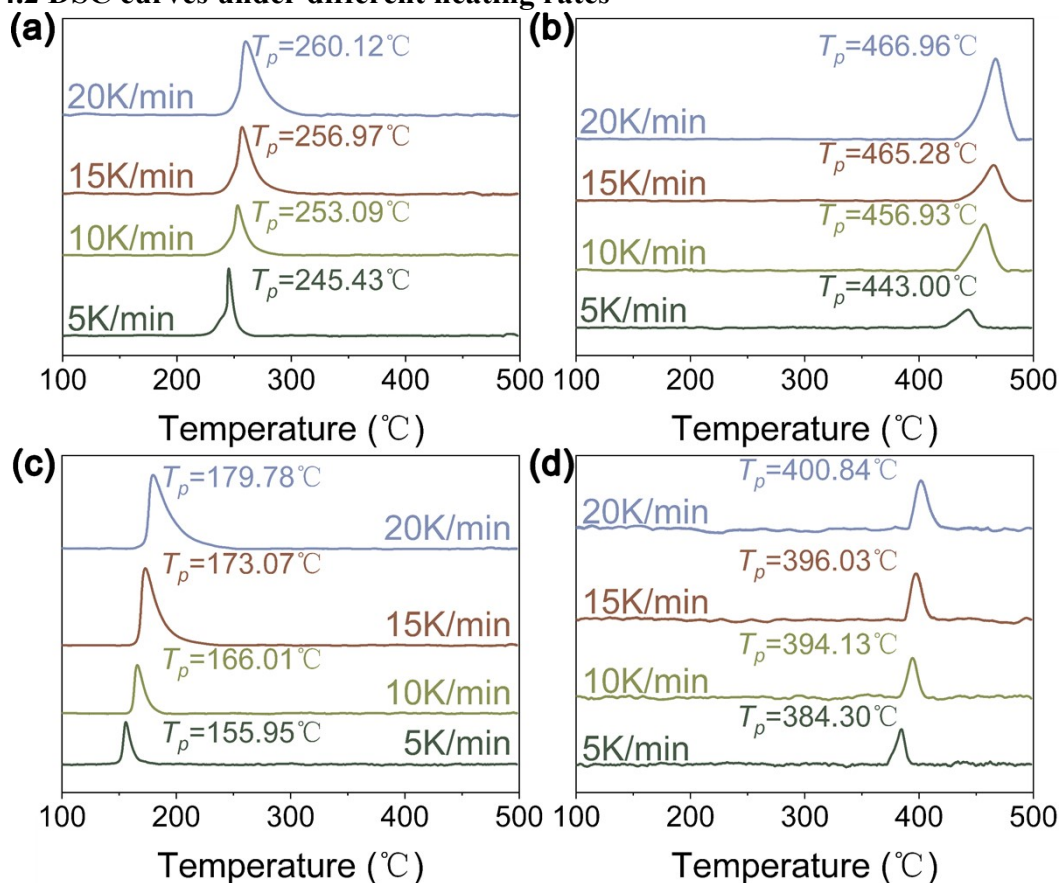

**Fig. S2** The DSC curves of co-formers at different heating rates ((a) CL-20; (b) DATC; (c) DATF; (d) BTAAT)

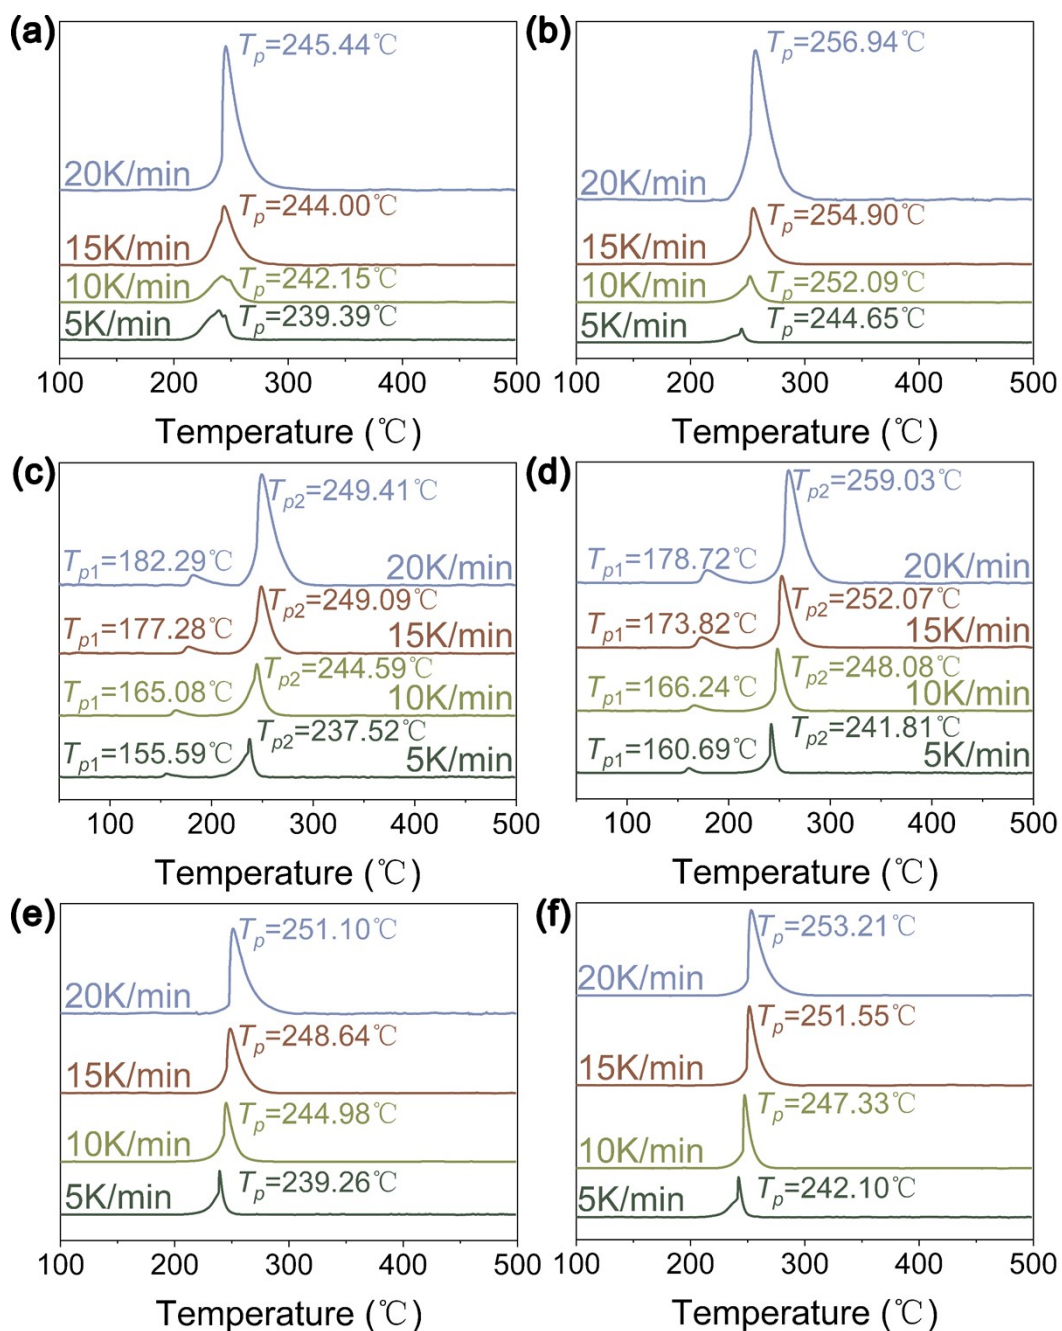

**Fig. S3** The DSC curves of CACs and PMs at different heating rates ((a) 1-CAC; (b) 1-PM; (c) 2-CAC; (d) 2-PM; (e) 3-CAC; (f) 3-PM)

## S4.3 Kinetics and thermodynamics

### S4.3.1 Fitting results of DSC data by Kissinger and Ozawa methods

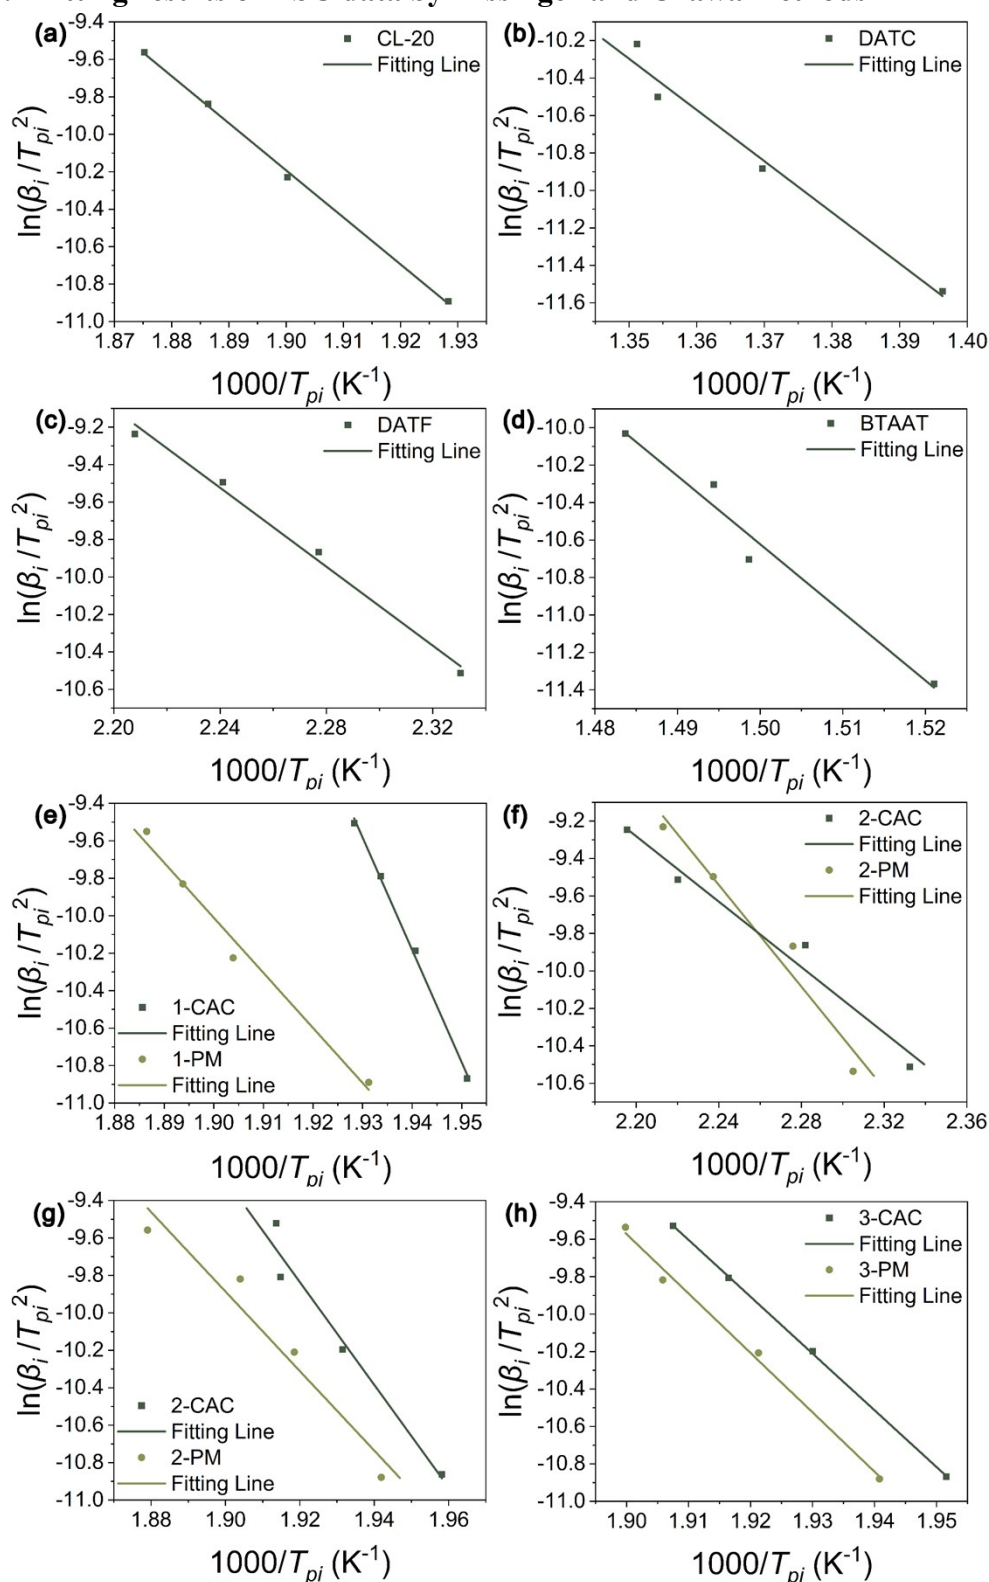

**Fig. S4** The fitting lines of DSC data of co-formers, CACs and PMs based on Kissinger method ((a) CL-20; (b) DATC; (c) DATF; (d) BTAAT; (e) CL-20/DATC; (f) the first exothermic peak of CL-20/DATF; (g) the second exothermic peak of CL-20/DATF; (h) CL-20/BTAAT)

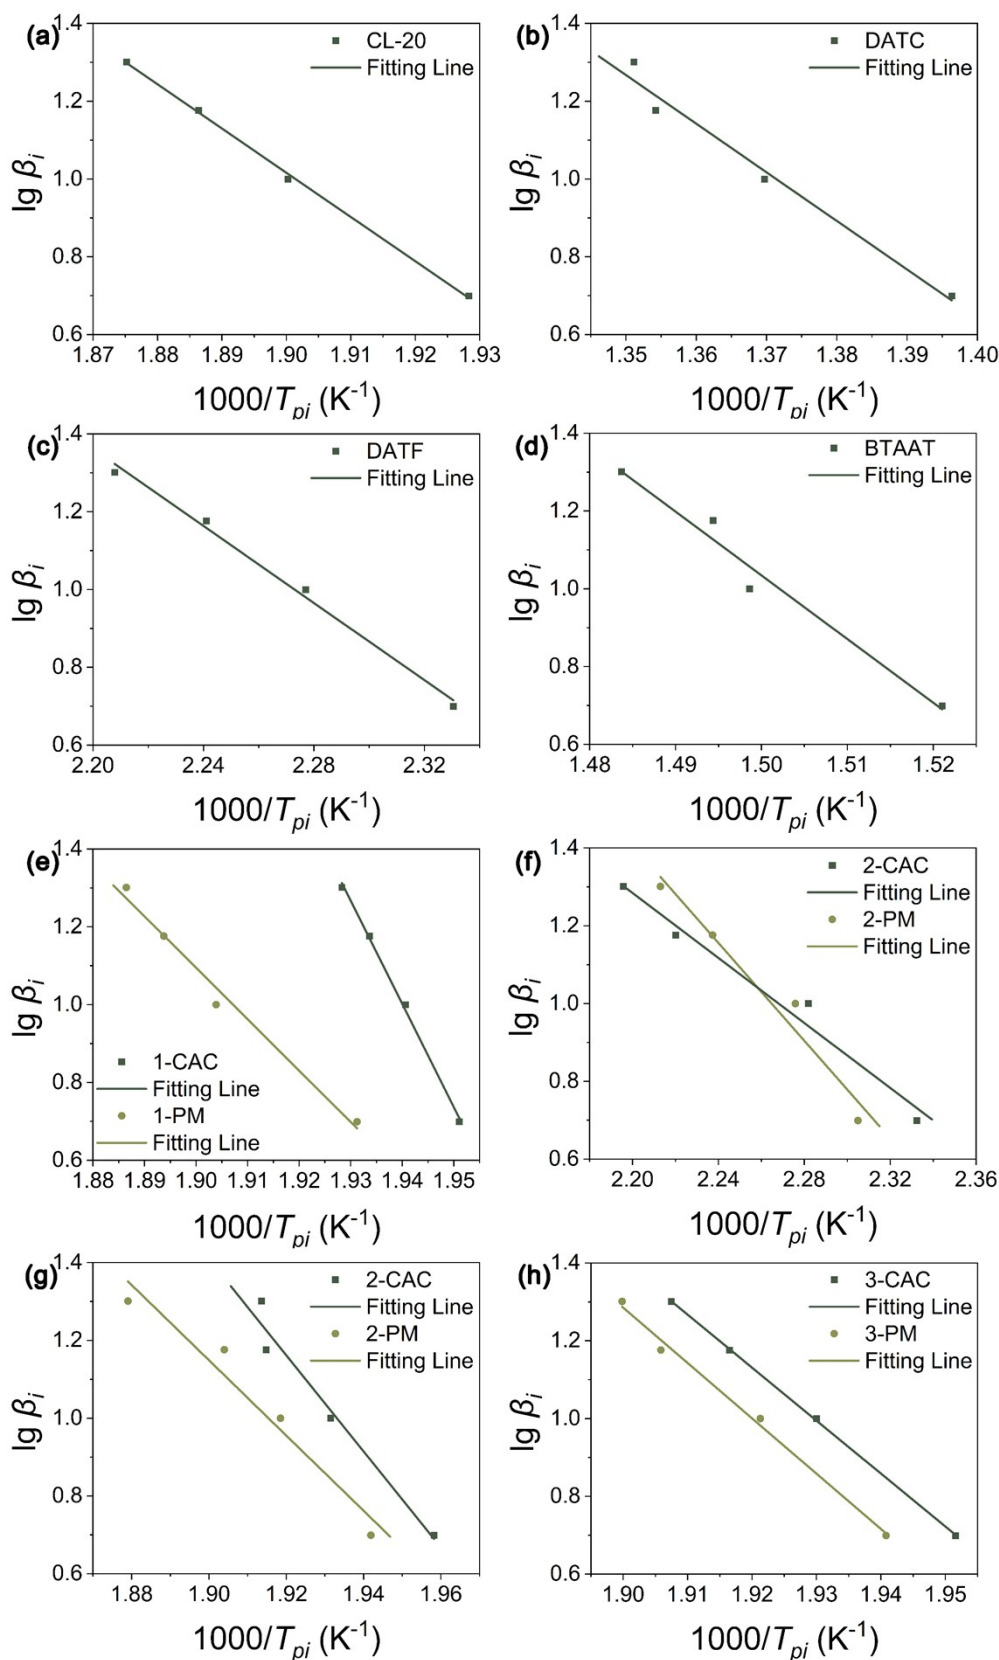

**Fig. S5** The fitting lines of DSC data of co-formers, CACs and PMs based on Ozawa method ((a) CL-20; (b) DATC; (c) DATF; (d) BTAAT; (e) CL-20/DATC; (f) the first exothermic peak of CL-20/DATF; (g) the second exothermic peak of CL-20/DATF; (h) CL-20/BTAAT)

**Table S4 The fitting equations, coefficients of determination ( $R^2$ ), activation energy ( $E_a$ ) and pre-exponential factor ( $A_K$ ) of Kissinger and Ozawa methods of co-formers, CACs and PMs**

| Sample                 | Kissinger method            |        |                   |                          | Ozawa method               |        |                   | Average values of $E_a$ [kJ/mol] |
|------------------------|-----------------------------|--------|-------------------|--------------------------|----------------------------|--------|-------------------|----------------------------------|
|                        | Fitting equation            | $R^2$  | $E_{aK}$ [kJ/mol] | $A_K$ [s <sup>-1</sup> ] | Fitting equation           | $R^2$  | $E_{aO}$ [kJ/mol] |                                  |
| CL-20                  | $y=-25136.17193x+37.56663$  | 0.9999 | 208.98            | $5.191 \times 10^{20}$   | $y=-11372.99964x+22.62487$ | 0.9989 | 207.04            | 208.01                           |
| DATC                   | $y=-27330.78754x+26.59948$  | 0.9765 | 227.23            | $9.742 \times 10^{15}$   | $y=-12501.78624x+18.14473$ | 0.9787 | 227.59            | 227.41                           |
| DATF                   | $y=-10529.31699x+14.06190$  | 0.9915 | 87.54             | $1.347 \times 10^{10}$   | $y=-4955.48214x+12.26376$  | 0.9928 | 90.21             | 88.88                            |
| BTAAT                  | $y=-36398.94983x+43.97618$  | 0.9698 | 302.62            | $4.568 \times 10^{23}$   | $y=-16385.59465x+25.61306$ | 0.9718 | 298.29            | 300.46                           |
| 1-CAC                  | $y=-60087.14890x+106.38607$ | 0.9977 | 499.56            | $9.587 \times 10^{50}$   | $y=-26543.25697x+52.4959$  | 0.9978 | 483.21            | 491.39                           |
| 1-PM                   | $y=-29378.51530x+45.80819$  | 0.9847 | 244.25            | $2.303 \times 10^{24}$   | $y=-13213.69466x+26.20082$ | 0.9857 | 240.55            | 242.40                           |
| 2-CAC<br>(first peak)  | $y=-8737.19601x+9.94086$    | 0.9705 | 72.64             | $1.814 \times 10^8$      | $y=-4178.28911x+10.47662$  | 0.9757 | 76.06             | 74.35                            |
| 2-CAC<br>(second peak) | $y=-27432.29046x+42.83467$  | 0.9651 | 228.07            | $1.099 \times 10^{23}$   | $y=-12362.39376x+24.89778$ | 0.9675 | 225.05            | 226.56                           |
| 2-PM<br>(first peak)   | $y=-13585.50856x+20.89031$  | 0.9568 | 112.95            | $1.606 \times 10^{13}$   | $y=-6284.64734x+15.23349$  | 0.9619 | 114.41            | 113.68                           |
| 2-PM<br>(second peak)  | $y=-21227.95088x+30.44719$  | 0.9476 | 176.49            | $3.548 \times 10^{17}$   | $y=-9673.89684x+19.52955$  | 0.9523 | 176.11            | 176.30                           |
| 3-CAC                  | $y=-30322.12459x+48.31179$  | 0.9998 | 252.10            | $2.906 \times 10^{25}$   | $y=-13618.76218x+27.27902$ | 0.9998 | 247.92            | 250.01                           |
| 3-PM                   | $y=-31723.92573x+50.70302$  | 0.9937 | 263.75            | $3.322 \times 10^{26}$   | $y=-14229.79581x+28.32183$ | 0.9941 | 259.05            | 261.40                           |

### S4.3.2 Calculation of zero-heating-rate peak temperature, critical temperature of thermal explosion and thermodynamics parameters

**Table S5** The values of  $T_{p0}$ ,  $T_b$  and other coefficients of the formula for zero-heating-rate peak temperatures of co-formers, CACs and PMs

| Sample | $T_{p0}$ [K] | $b$    | $c \times 10^2$ | $d \times 10^4$ | $T_b$ [K] |
|--------|--------------|--------|-----------------|-----------------|-----------|
| CL-20  | 504.09       | 3.784  | 19.76           | 40.67           | 514.68    |
| DATC   | 697.73       | 4.060  | -6.800          | -14.53          | 716.50    |
| DATF   | 413.39       | 3.884  | -16.60          | 35.33           | 430.75    |
| BTAAT  | 628.85       | 8.320  | -59.22          | 144.5           | 640.19    |
| 1-CAC  | 508.37       | 1.008  | -3.820          | 6.667           | 512.82    |
| 1-PM   | 501.87       | 4.292  | -24.70          | 51.47           | 510.82    |
| 2-CAC  | 431.86       | -2.545 | 45.02           | -132.0          | 455.01    |
|        | 502.64       | 1.595  | 1.300           | -21.47          | 512.27    |
| 2-PM   | 435.03       | -1.226 | 22.90           | -62.80          | 449.83    |
|        | 501.16       | 3.863  | -25.56          | 70.00           | 513.60    |
| 3-CAC  | 503.77       | 2.077  | -7.560          | 11.47           | 512.50    |
| 3-PM   | 510.56       | 0.7807 | 4.180           | -20.67          | 519.13    |

**Table S6** The values of thermodynamics parameters of co-formers, CACs and PMs

| Sample | $\Delta H^\ddagger$ [kJ/mol] | $\Delta S^\ddagger$ [J/(mol·K)] | $\Delta G^\ddagger$ [kJ/mol] |
|--------|------------------------------|---------------------------------|------------------------------|
| CL-20  | 204.79                       | 138.98                          | 134.73                       |
| DATC   | 221.43                       | 45.79                           | 189.48                       |
| DATF   | 84.10                        | -62.03                          | 109.74                       |
| BTAAT  | 297.39                       | 193.50                          | 175.71                       |
| 1-CAC  | 495.34                       | 718.32                          | 130.17                       |
| 1-PM   | 240.08                       | 208.83                          | 135.27                       |
| 2-CAC  | 69.05                        | -98.20                          | 111.46                       |
|        | 223.89                       | 183.52                          | 131.64                       |
| 2-PM   | 109.33                       | -3.56                           | 110.88                       |
|        | 172.32                       | 78.43                           | 133.02                       |
| 3-CAC  | 247.91                       | 229.88                          | 132.10                       |
| 3-PM   | 259.51                       | 250.02                          | 131.86                       |

### S4.3.3 Analysis results of DSC data by Friedman method

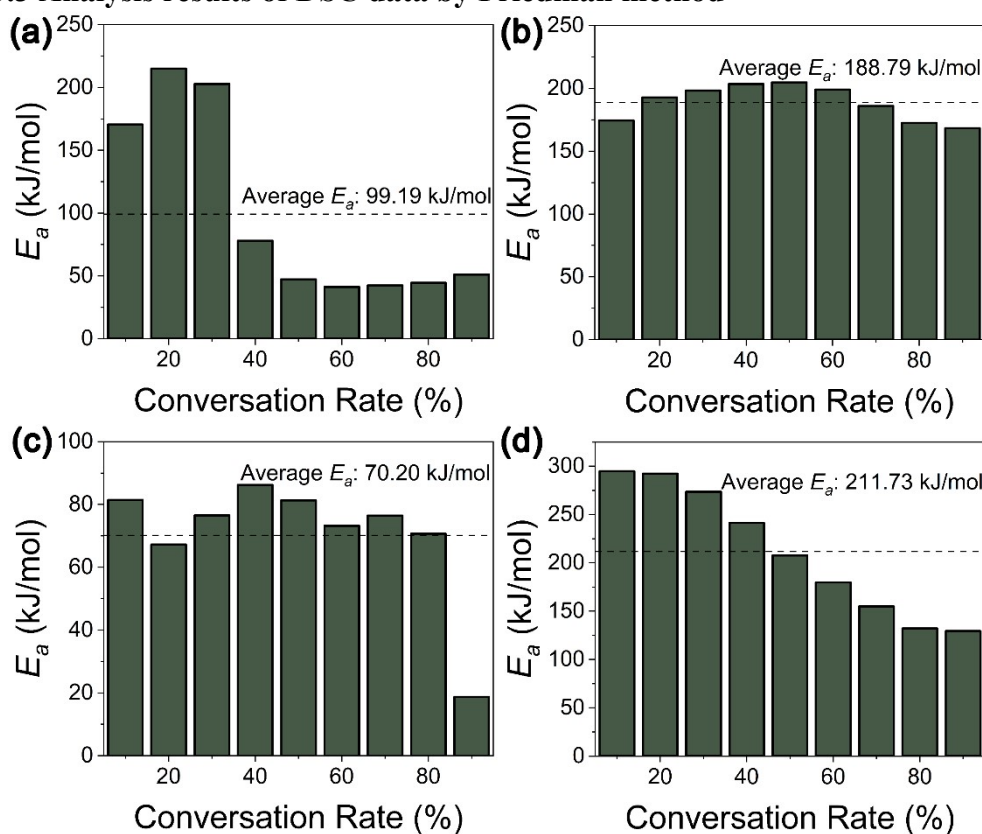

**Fig. S6** The activation energies of (a) CL-20, (b) DATC, (c) DATF and (d) BTAAT based on Friedman method

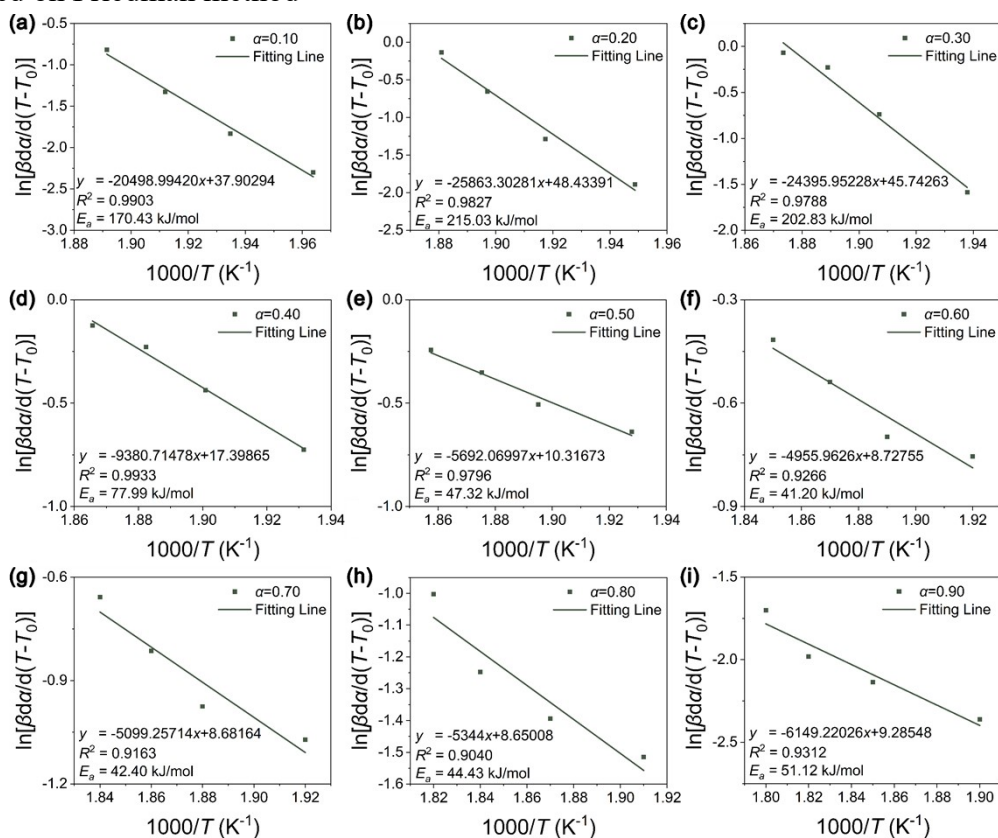

**Fig. S7** The fitting lines of DSC data of CL-20 based on Friedman method

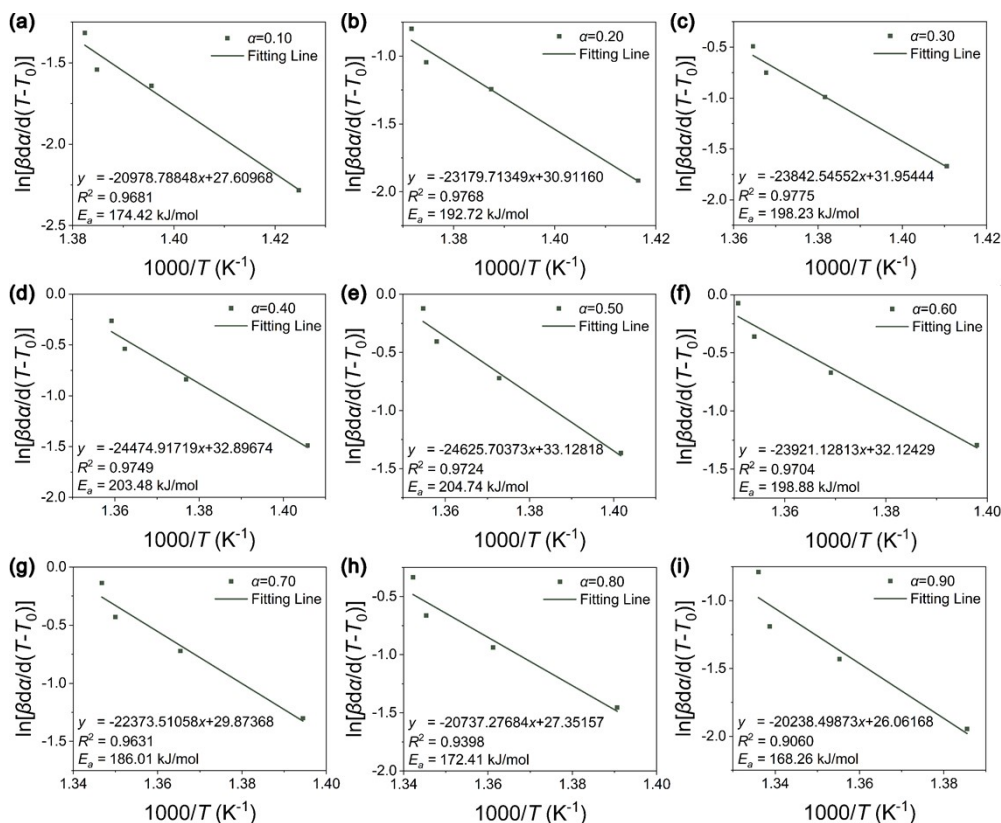

Fig. S8 The fitting lines of DSC data of DATC based on Friedman method

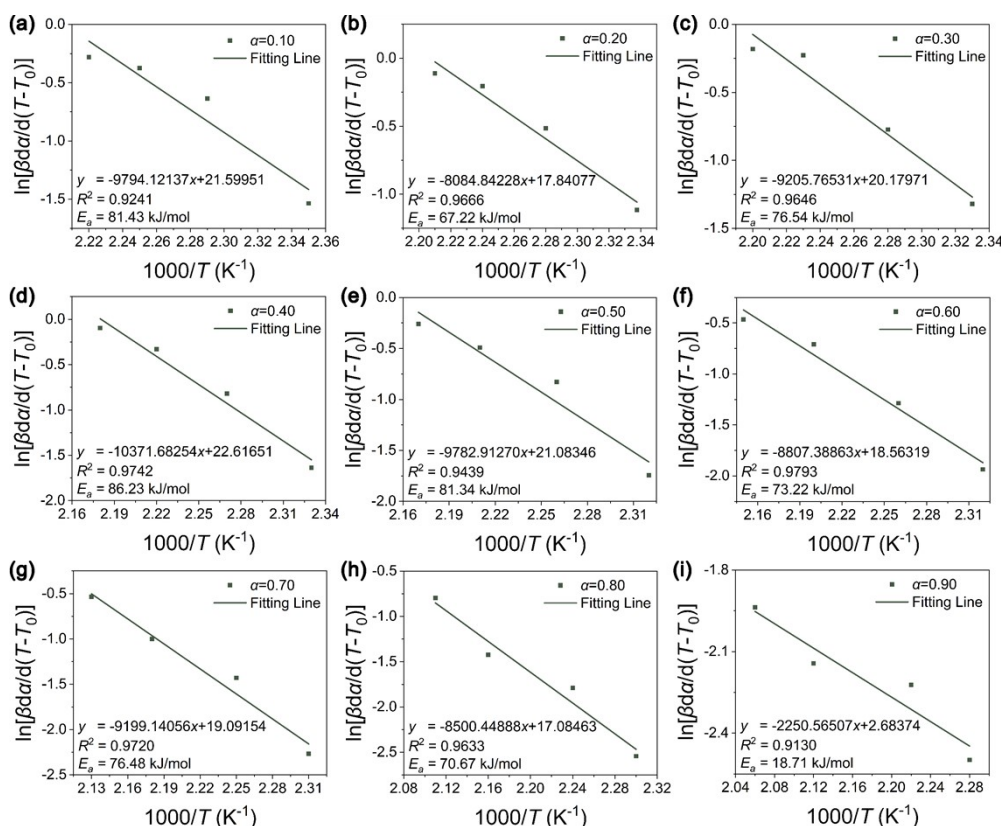

Fig. S9 The fitting lines of DSC data of DATF based on Friedman method

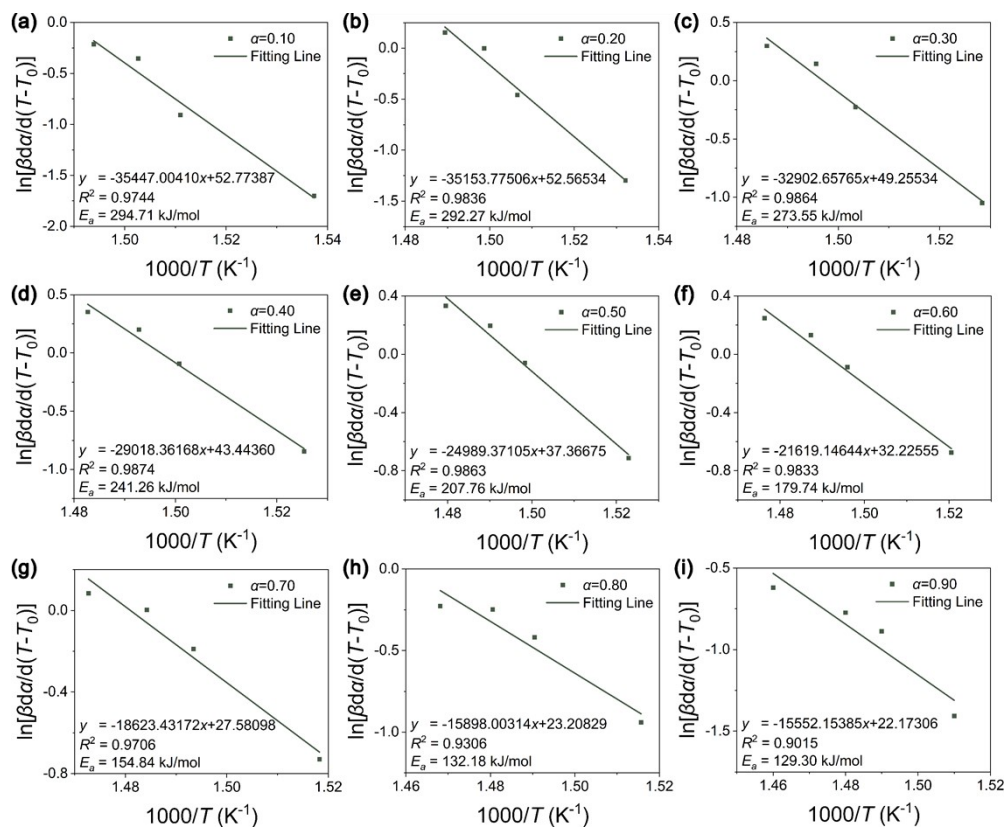

**Fig. S10** The fitting lines of DSC data of BTAAT based on Friedman method

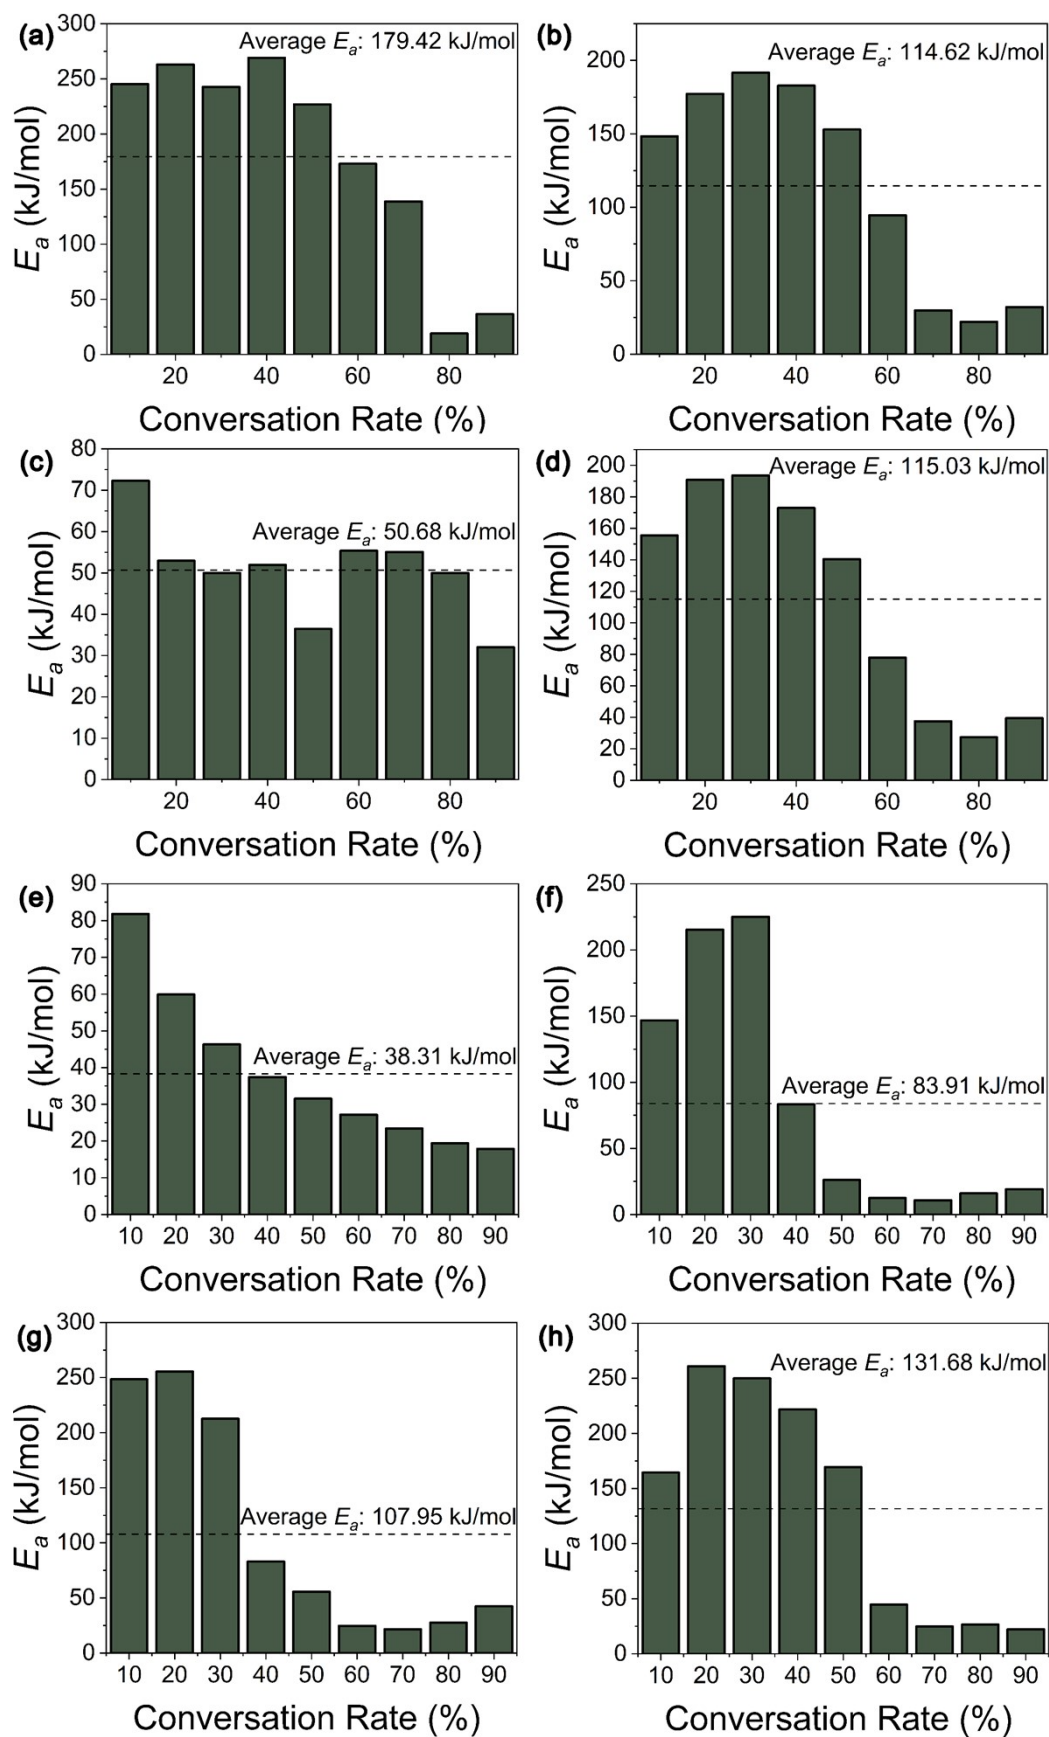

**Fig. S11** The activation energies of (a) 1-CAC, (b) 1-PM, (c) 2-CAC (first peak), (d) 2-CAC (second peak), (e) 2-PM (first peak), (f) 2-PM (second peak), (g) 3-CAC and (h) 3-CAC based on Friedman method

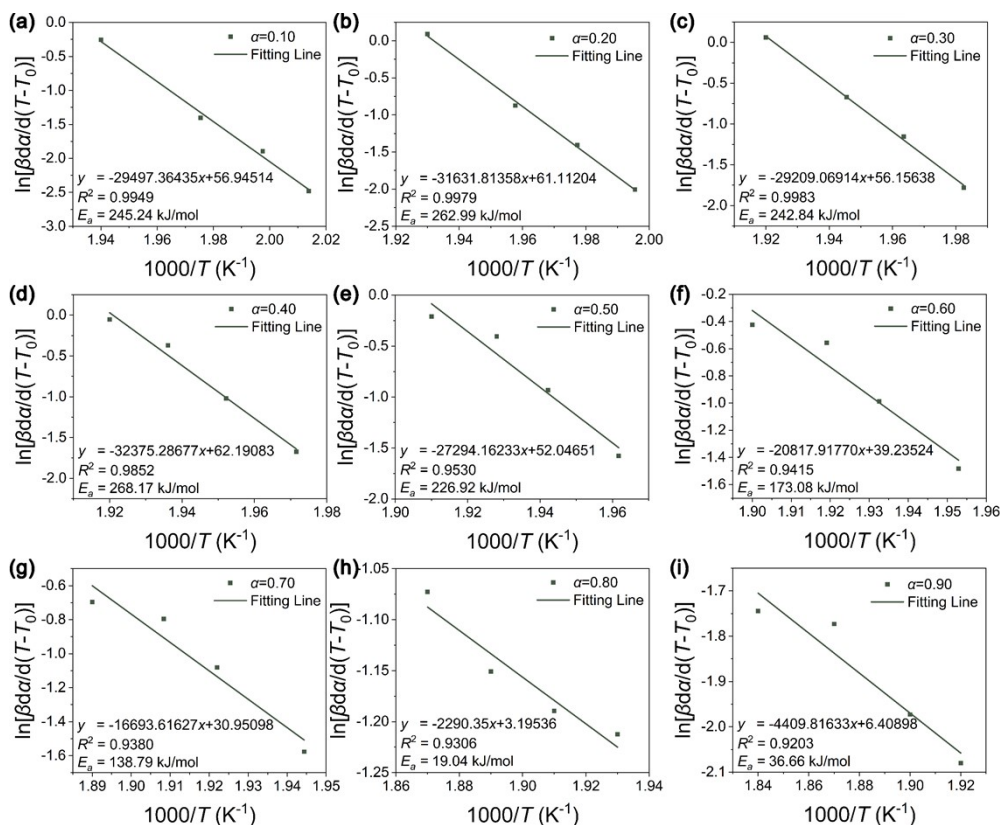

**Fig. S12** The fitting lines of DSC data of 1-CAC based on Friedman method

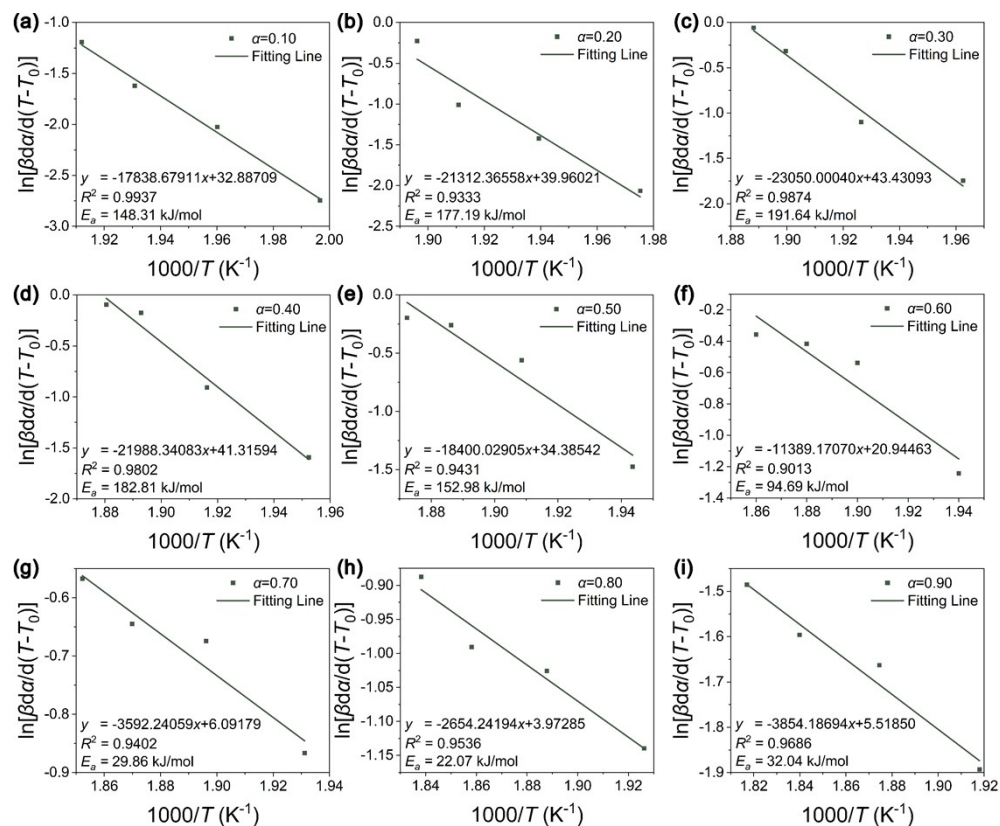

**Fig. S13** The fitting lines of DSC data of 1-PM based on Friedman method

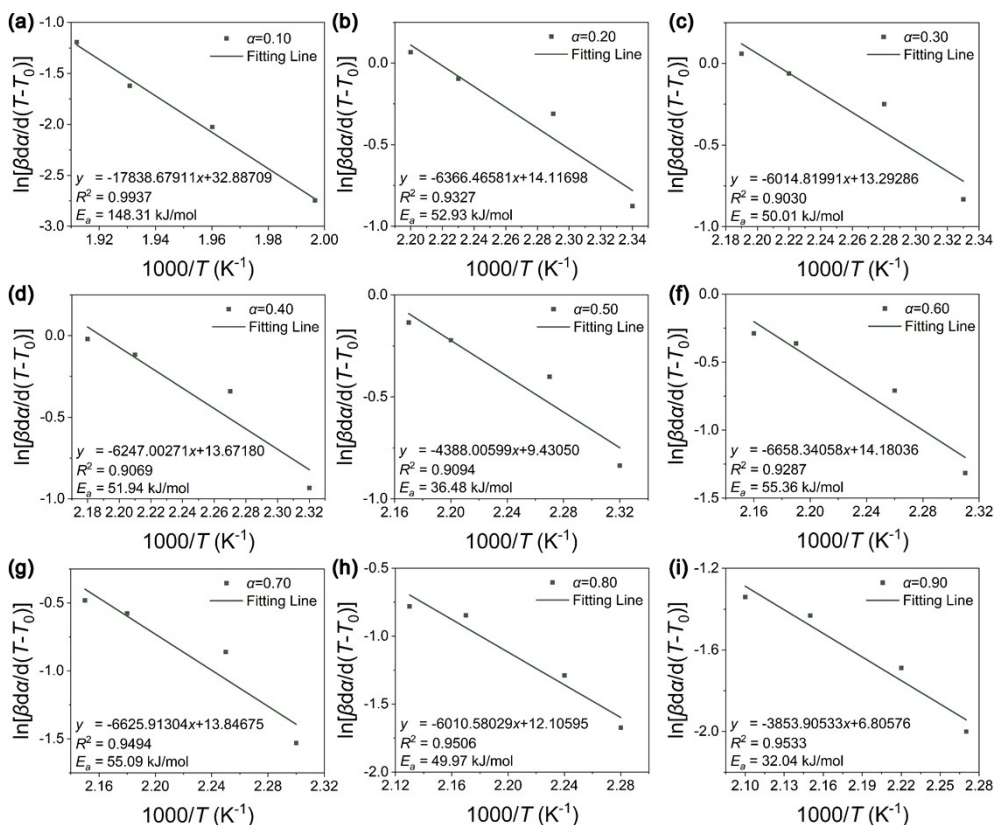

**Fig. S14** The fitting lines of DSC data of 2-CAC (first exothermic peak) based on Friedman method

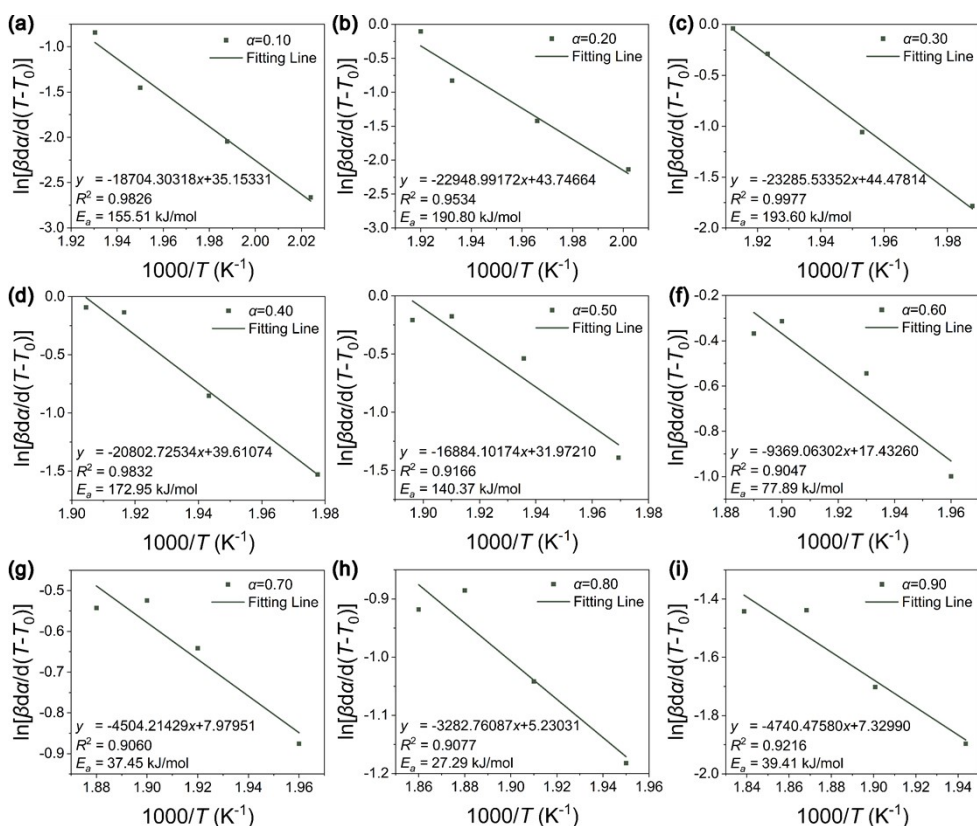

**Fig. S15** The fitting lines of DSC data of 2-CAC (second exothermic peak) based on Friedman method

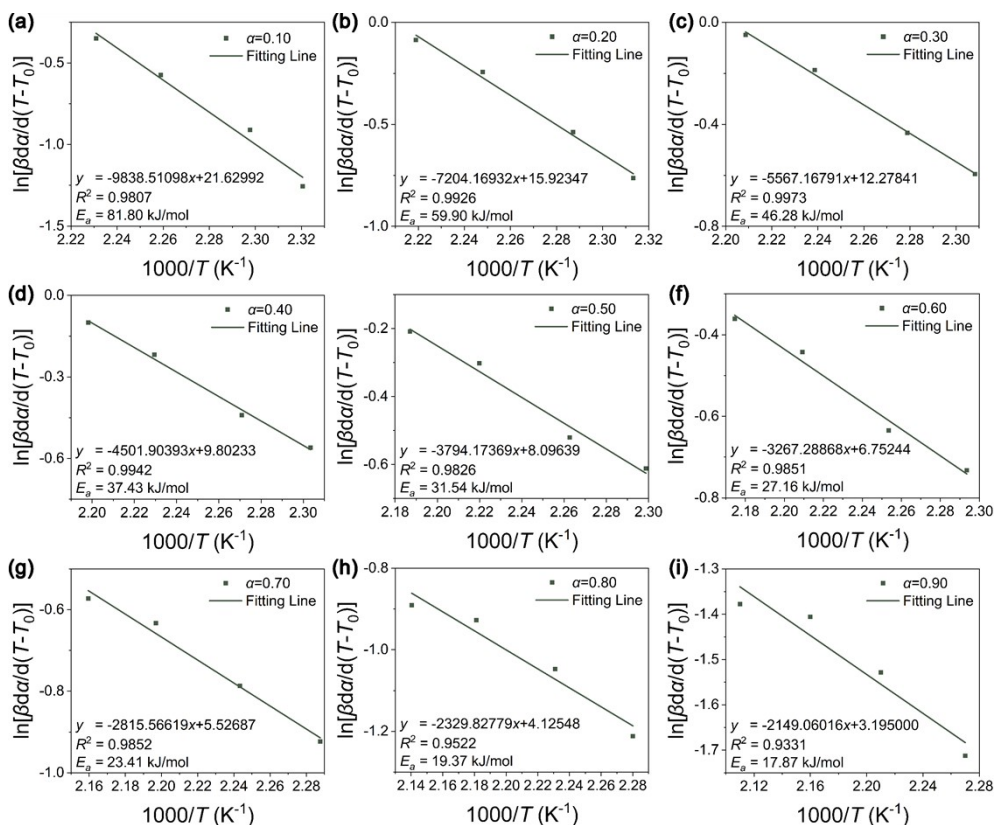

**Fig. S16** The fitting lines of DSC data of 2-PM (first exothermic peak) based on Friedman method

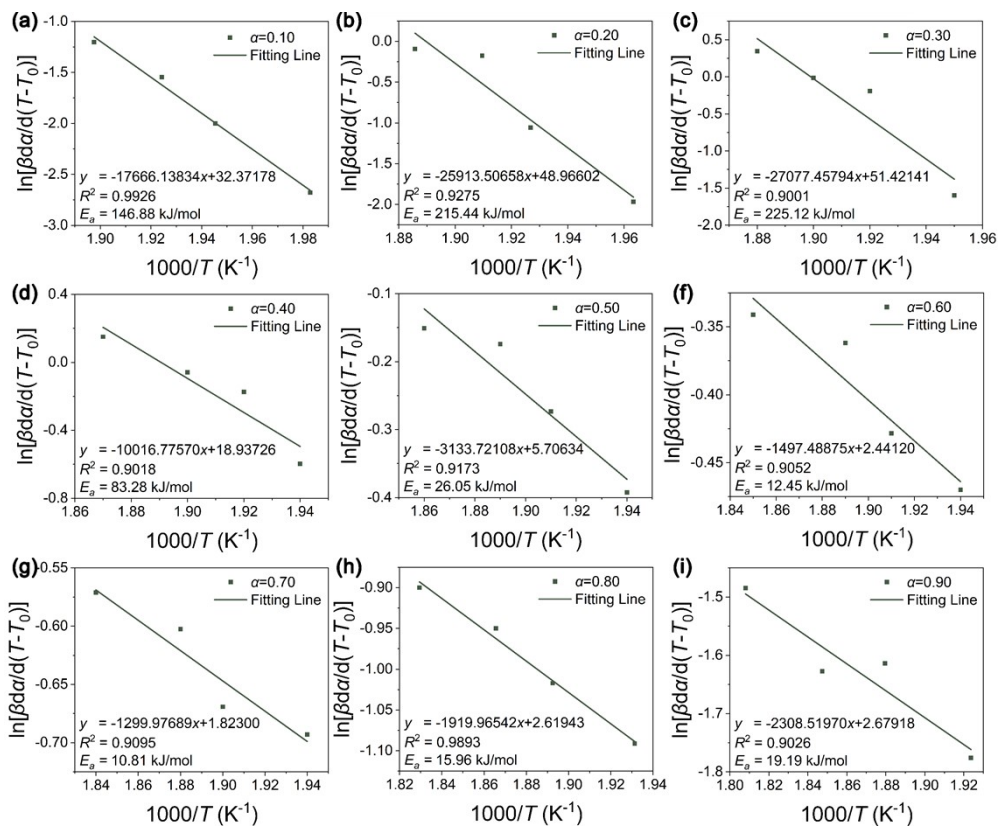

**Fig. S17** The fitting lines of DSC data of 2-PM (second exothermic peak) based on Friedman method

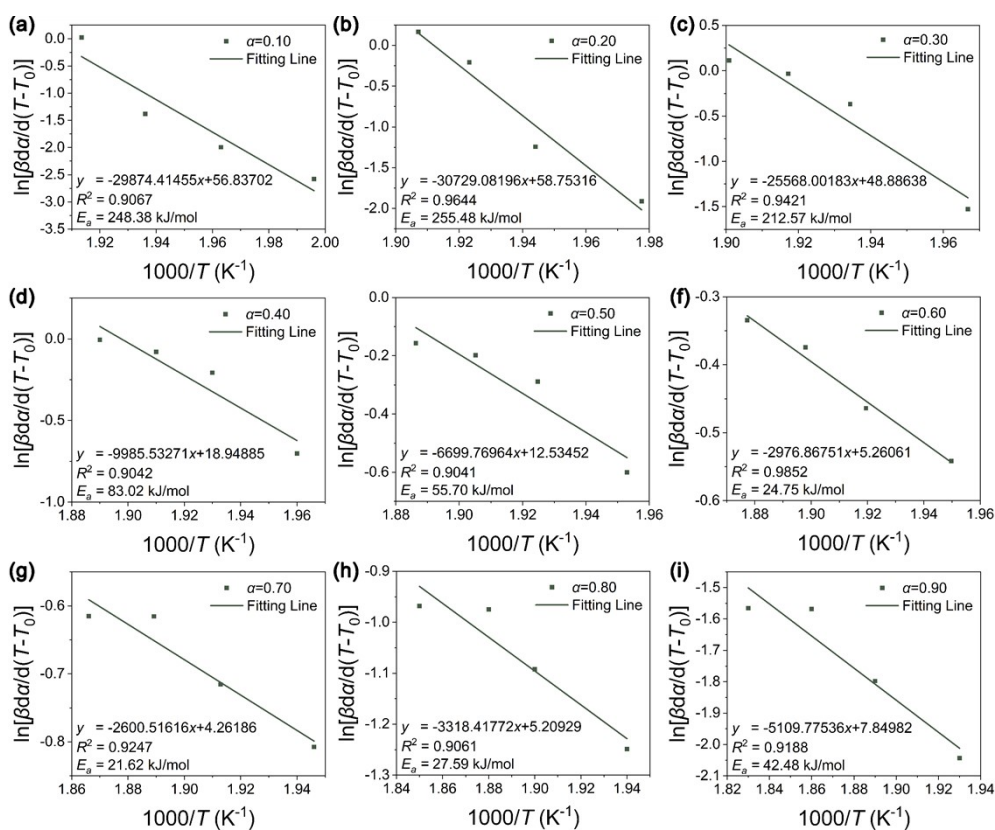

Fig. S18 The fitting lines of DSC data of 3-CAC based on Friedman method

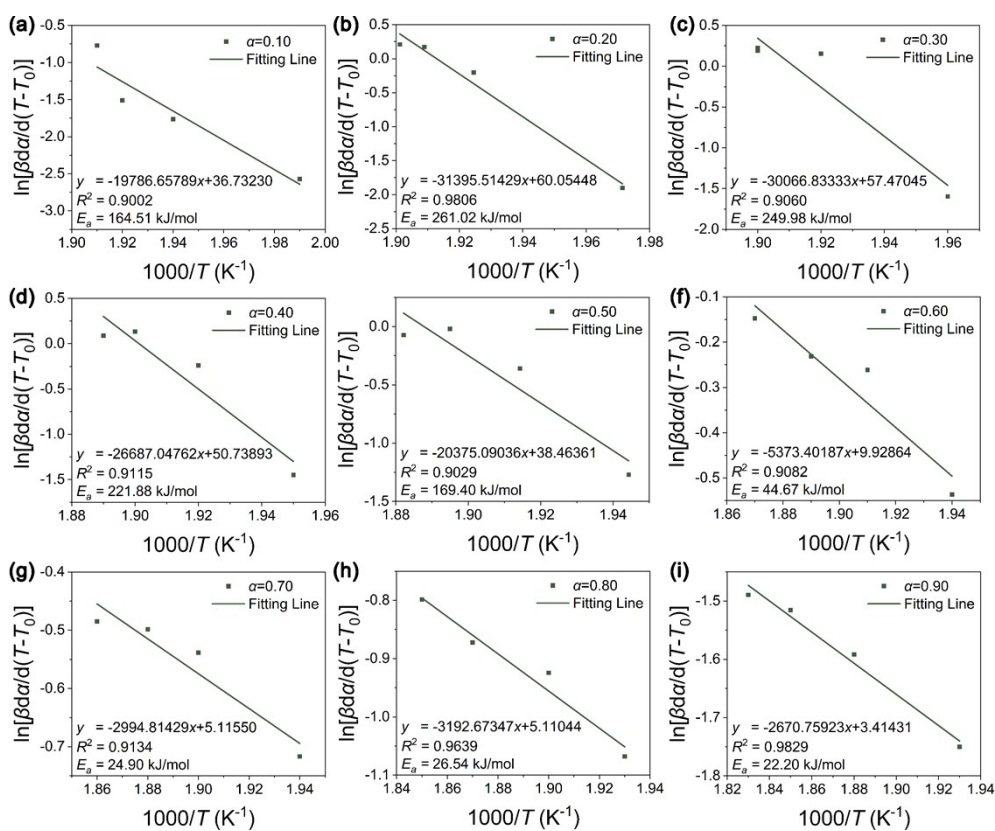

Fig. S19 The fitting lines of DSC data of 3-PM based on Friedman method

### S4.3.4 Analysis results of DSC data by CKA method

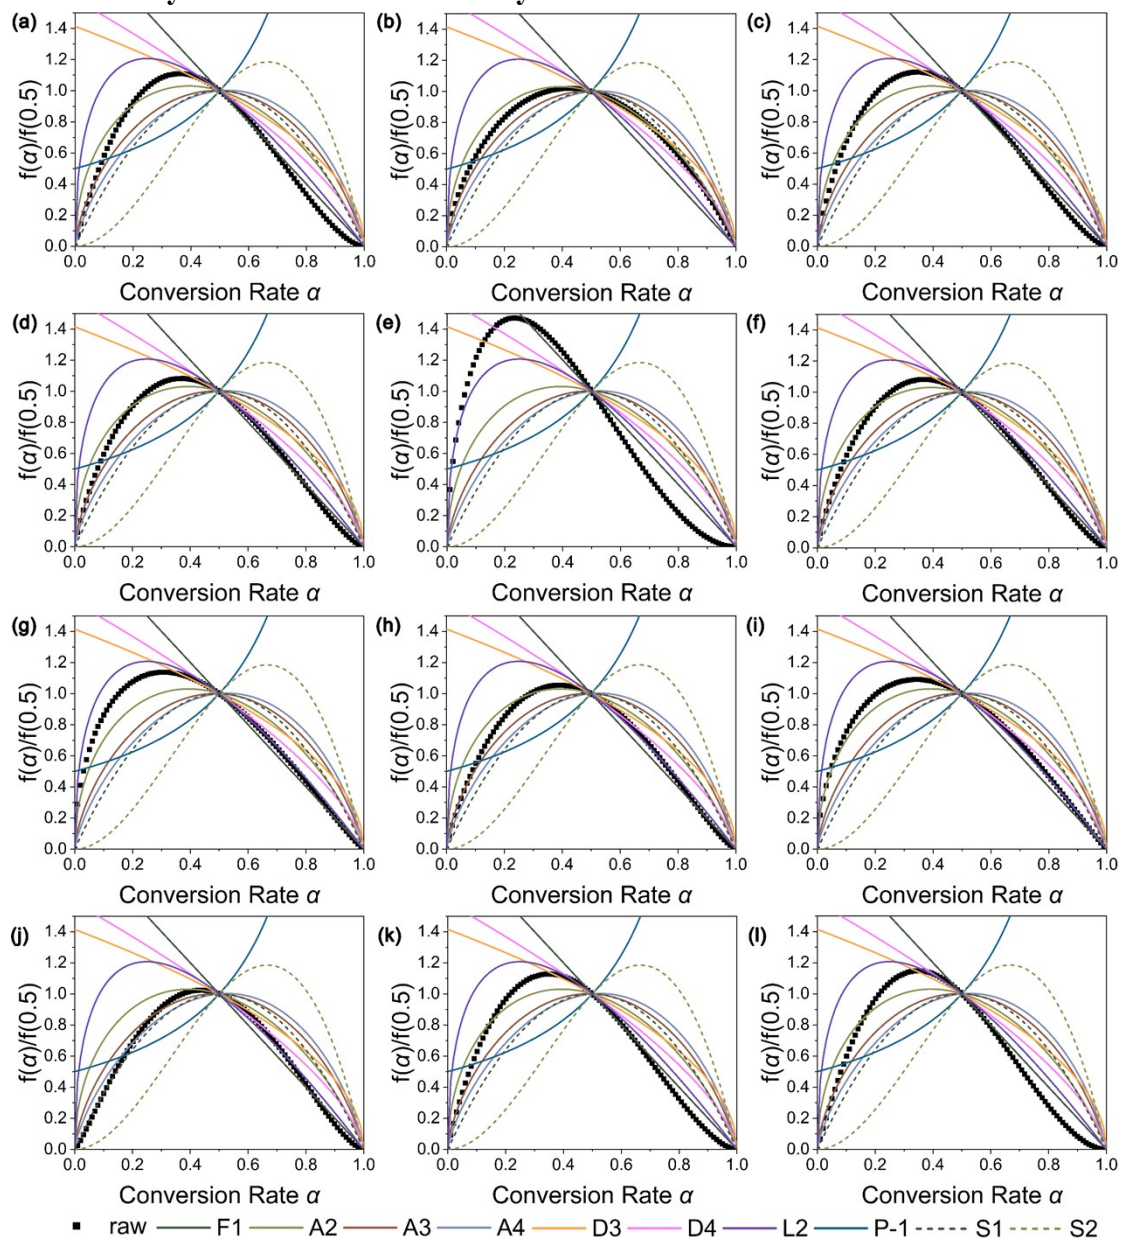

**Fig. S20** The Analysis results of DSC data based on CKA method ((a) CL-20; (b) DATC; (c) DATF; (d) BTAAT; (e) 1-CAC; (f) 1-PM; (g) 2-CAC (first exothermic peak); (h) 2-CAC (second exothermic peak); (i) 2-PM (first exothermic peak); (j) 2-PM (second exothermic peak); (k) 3-CAC; (l) 3-PM)

## S5 Theoretical calculation

### S5.1 Calculation details

Geometry optimization and frequency analysis were performed on single molecules of CL-20 and NEMs. The bimolecular model of optimized CL-20 and NEMs were established using GaussView 6.0. Geometry optimization and frequency analysis were then performed on bimolecular model. Above calculations were conducted using Gaussian 16 (Rev. C.01)<sup>15</sup> under conditions: B3LYP<sup>16, 17/6-311G(d,p)</sup><sup>18</sup> EM=GD3.<sup>19</sup>

Multiwfn Version 3.8(dev)<sup>20, 21</sup> was used for independent gradient model based on Hirshfeld partition (IGMH) analysis.<sup>22</sup> The result was then visualized using VMD Version 1.9.3.<sup>23</sup>

### S5.2 Calculation results

The Cartesian coordinates of optimized CL-20/DATC, CL-20/DATF and CL-20/BTAAT were listed in Table S7-S9. The visualized calculation results were shown in Fig. S21.

**Table S7 Cartesian coordinates of CL-20/DATC**

|   |          |          |          |
|---|----------|----------|----------|
| C | -1.6499  | 1.93032  | 1.3781   |
| H | -2.42058 | 1.16662  | 1.38451  |
| C | -1.74414 | 2.89192  | 0.11783  |
| N | -0.35314 | 1.30513  | 1.37866  |
| N | -1.81489 | 2.82983  | 2.53113  |
| H | -2.5649  | 2.63905  | -0.54523 |
| N | -0.5015  | 2.81891  | -0.60534 |
| N | -1.95192 | 4.22812  | 0.69855  |
| C | 0.79904  | 2.17229  | 1.37733  |
| N | -0.21751 | -0.06249 | 1.75004  |
| C | -1.48623 | 4.18581  | 2.08631  |
| N | -3.0151  | 2.68083  | 3.31989  |
| C | 0.705    | 3.13169  | 0.11991  |
| N | -0.50012 | 2.82125  | -2.02898 |
| N | -3.22871 | 4.86018  | 0.46364  |
| H | 1.69695  | 1.5653   | 1.38414  |
| N | 0.802    | 3.14289  | 2.48763  |
| O | -1.25101 | -0.65499 | 1.9721   |
| O | 0.90996  | -0.50206 | 1.75553  |
| C | 0.1031   | 4.35885  | 2.09947  |
| H | -1.96923 | 4.93884  | 2.697    |
| O | -3.31745 | 3.63303  | 4.00141  |
| O | -3.55719 | 1.59943  | 3.26096  |
| H | 1.55232  | 3.04093  | -0.54982 |
| N | 0.67306  | 4.45786  | 0.76418  |
| O | -1.58983 | 2.80242  | -2.55875 |
| O | 0.58731  | 2.79046  | -2.55906 |
| O | -3.83915 | 4.47621  | -0.50933 |
| O | -3.52466 | 5.74741  | 1.23033  |
| N | 0.66144  | 2.68999  | 3.80358  |
| H | 0.39003  | 5.19971  | 2.71956  |

|   |          |          |          |
|---|----------|----------|----------|
| N | 0.37687  | 5.59167  | 0.00042  |
| O | 0.95808  | 1.52875  | 3.99936  |
| O | 0.28826  | 3.51826  | 4.61233  |
| O | -0.0105  | 6.56301  | 0.62158  |
| O | 0.5693   | 5.49134  | -1.19445 |
| N | -0.29413 | -5.33027 | -4.7398  |
| C | 1.06621  | -4.91633 | -4.97217 |
| N | 1.69185  | -4.06123 | -4.15264 |
| N | 0.91476  | -3.66746 | -3.14169 |
| C | -0.44637 | -4.0816  | -2.90917 |
| N | -1.07159 | -4.9366  | -3.72874 |
| N | -0.69045 | -6.19417 | -5.7082  |
| C | 0.44411  | -6.27239 | -6.49222 |
| N | 1.51235  | -5.52439 | -6.08484 |
| N | 1.31089  | -2.80359 | -2.17344 |
| C | 0.17621  | -2.72531 | -1.38961 |
| N | -0.89203 | -3.47343 | -1.79654 |
| N | 0.47239  | -7.04981 | -7.59278 |
| N | 0.14781  | -1.94762 | -0.2893  |
| H | 1.31086  | -7.08932 | -8.1466  |
| H | -0.33638 | -7.58529 | -7.85829 |
| H | -0.69076 | -1.90814 | 0.2644   |
| H | 0.9564   | -1.41187 | -0.02381 |

**Table S8 Cartesian coordinates of CL-20/DATF**

|   |          |          |          |
|---|----------|----------|----------|
| C | 0.18082  | 0.84906  | 0        |
| H | -0.24094 | 0.97194  | -0.9921  |
| C | 1.76884  | 0.84903  | 0.00005  |
| N | -0.2752  | -0.39356 | 0.56604  |
| N | -0.17977 | 1.99365  | 0.85188  |
| H | 2.19067  | 0.97192  | -0.99202 |
| N | 2.22476  | -0.39362 | 0.56609  |
| N | 2.12942  | 1.99361  | 0.85197  |
| C | 0.18253  | -0.72307 | 1.89321  |
| N | -1.40611 | -1.05956 | 0.0145   |
| C | 0.9748   | 2.29595  | 1.70049  |
| N | -0.82469 | 3.11648  | 0.21298  |
| C | 1.76695  | -0.7231  | 1.89325  |
| N | 3.35591  | -1.05947 | 0.01482  |
| N | 2.77439  | 3.11643  | 0.21308  |
| H | -0.24374 | -1.67538 | 2.18669  |
| N | -0.11108 | 0.32344  | 2.88993  |
| O | -1.87973 | -0.55962 | -0.9826  |
| O | -1.74358 | -2.08093 | 0.56889  |
| C | 0.97476  | 1.29078  | 2.94376  |
| H | 0.97481  | 3.32816  | 2.02886  |
| O | -0.77102 | 4.16472  | 0.81372  |
| O | -1.40054 | 2.8766   | -0.8251  |
| H | 2.19318  | -1.67542 | 2.18676  |
| N | 2.06057  | 0.32342  | 2.88994  |

|   |          |          |          |
|---|----------|----------|----------|
| O | 3.82965  | -0.55954 | -0.98224 |
| O | 3.69337  | -2.08078 | 0.56931  |
| O | 3.35029  | 2.87653  | -0.82496 |
| O | 2.72074  | 4.16466  | 0.81384  |
| N | -1.42132 | 0.79014  | 3.03842  |
| H | 0.97477  | 1.83964  | 3.87791  |
| N | 3.37084  | 0.79008  | 3.03835  |
| O | -2.29747 | 0.04244  | 2.65355  |
| O | -1.53947 | 1.87964  | 3.56607  |
| O | 3.48904  | 1.87964  | 3.56585  |
| O | 4.24692  | 0.04241  | 2.65328  |
| C | 5.97788  | 5.18544  | -0.30654 |
| C | 6.10906  | 5.87298  | 0.95595  |
| N | 5.63211  | 6.06565  | -1.19582 |
| N | 6.2315   | 3.86502  | -0.59726 |
| N | 5.8331   | 7.12741  | 0.76848  |
| N | 6.4495   | 5.41757  | 2.22981  |
| O | 5.55284  | 7.25875  | -0.53166 |
| H | 5.8871   | 3.58745  | -1.507   |
| H | 6.00052  | 3.20803  | 0.13684  |
| N | 6.76055  | 4.21146  | 2.22264  |
| N | 7.10366  | 3.74495  | 3.4179   |
| C | 7.41368  | 2.40624  | 3.55092  |
| H | 7.02082  | 4.35009  | 4.23195  |
| C | 7.69737  | 1.44293  | 2.51844  |
| N | 7.53062  | 1.83551  | 4.70428  |
| N | 7.97308  | 0.3223   | 3.11024  |
| N | 7.62192  | 1.59904  | 1.1506   |
| O | 7.87135  | 0.55254  | 4.44671  |
| H | 8.04718  | 0.83101  | 0.64746  |
| H | 7.91731  | 2.50456  | 0.80686  |

**Table S9 Cartesian coordinates of CL-20/BTAAT**

|   |          |          |          |
|---|----------|----------|----------|
| C | -0.79401 | -0.02818 | -1.16051 |
| H | -1.21577 | 0.09471  | -2.15261 |
| C | 0.79402  | -0.0282  | -1.16046 |
| N | -1.25002 | -1.2708  | -0.59448 |
| N | -1.15459 | 1.11642  | -0.30863 |
| H | 1.21585  | 0.09469  | -2.15253 |
| N | 1.24994  | -1.27086 | -0.59442 |
| N | 1.15459  | 1.11638  | -0.30855 |
| C | -0.79229 | -1.60031 | 0.7327   |
| N | -2.38093 | -1.9368  | -1.14601 |
| C | -0.00002 | 1.41872  | 0.53998  |
| N | -1.79951 | 2.23924  | -0.94753 |
| C | 0.79212  | -1.60034 | 0.73273  |
| N | 2.38109  | -1.93671 | -1.14569 |
| N | 1.79957  | 2.23919  | -0.94743 |
| H | -1.21856 | -2.55261 | 1.02618  |
| N | -1.0859  | -0.55379 | 1.72942  |

---

|   |          |          |          |
|---|----------|----------|----------|
| O | -2.85456 | -1.43686 | -2.14311 |
| O | -2.7184  | -2.95816 | -0.59162 |
| C | -0.00006 | 0.41355  | 1.78324  |
| H | -0.00001 | 2.45093  | 0.86835  |
| O | -1.74585 | 3.28748  | -0.34679 |
| O | -2.37537 | 1.99937  | -1.98561 |
| H | 1.21836  | -2.55265 | 1.02625  |
| N | 1.08575  | -0.55382 | 1.72943  |
| O | 2.85483  | -1.43678 | -2.14275 |
| O | 2.71855  | -2.95802 | -0.5912  |
| O | 2.37547  | 1.9993   | -1.98547 |
| O | 1.74592  | 3.28743  | -0.34667 |
| N | -2.39615 | -0.0871  | 1.87791  |
| H | -0.00005 | 0.9624   | 2.71739  |
| N | 2.39601  | -0.08716 | 1.87784  |
| O | -3.27229 | -0.83479 | 1.49303  |
| O | -2.51429 | 1.0024   | 2.40555  |
| O | 2.51422  | 1.00241  | 2.40534  |
| O | 3.2721   | -0.83483 | 1.49277  |
| N | -0.37457 | -3.29822 | -7.01873 |
| C | 0.15218  | -3.63548 | -5.7972  |
| N | -0.53881 | -4.22621 | -4.79235 |
| N | -1.84211 | -4.5024  | -5.01179 |
| C | -2.35676 | -4.16718 | -6.21965 |
| N | -1.65183 | -3.5689  | -7.2338  |
| C | 2.34495  | -3.4956  | -4.60823 |
| N | 1.48328  | -3.31275 | -5.67563 |
| C | -4.67846 | -4.98405 | -5.79084 |
| N | -3.67172 | -4.40521 | -6.54363 |
| N | 3.6515   | -3.10144 | -4.68428 |
| N | 4.31061  | -3.3987  | -3.47055 |
| C | 3.31175  | -3.95744 | -2.76275 |
| N | 2.088    | -4.03848 | -3.41873 |
| N | -5.93846 | -5.13373 | -6.29902 |
| N | -6.77101 | -5.74717 | -5.33649 |
| C | -5.90992 | -5.91185 | -4.31554 |
| N | -4.6154  | -5.45922 | -4.54751 |
| N | 3.45461  | -4.42119 | -1.49181 |
| N | -6.24889 | -6.47781 | -3.12578 |
| H | 1.85369  | -2.87841 | -6.51131 |
| H | -3.90089 | -4.09791 | -7.48026 |
| H | 4.16913  | -2.6633  | -5.42614 |
| H | -6.32569 | -4.88725 | -7.1932  |
| H | 2.6609   | -4.82578 | -1.02881 |
| H | 4.34032  | -4.36003 | -1.02337 |
| H | -5.54903 | -6.56595 | -2.41132 |
| H | -7.18483 | -6.80268 | -2.96406 |

---

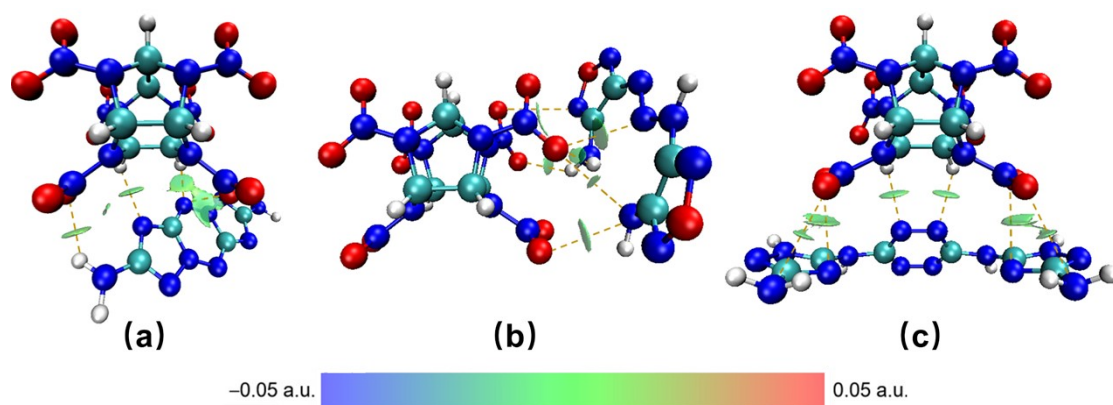

**Fig. S21** Visualized results of intermolecular interactions of (a) CL-20/DATC, (b) CL-20/DATF and (c) CL-20/BTAAT

## Reference

1. Y. F. Chang, North University of China, 2024.
2. G. F. Rudakov, V. P. Sinditskii, I. A. Andreeva, A. I. Botnikova, P. R. Veselkina, S. K. Kostanyan, N. V. Yudin, V. V. Serushkin, G. V. Cherkaev and O. V. Dorofeeva, *Chem. Eng. J.*, 2022, 450, 138073.
3. J. Zhu, Q. Chen, S. Jing, K. Li, Z. Wang, Y. Wang and J. Deng, *Heterocycles*, 2023, 106, 1866-1876.
4. A. Shlomovich, T. Pechersky, A. Cohen, Q. L. Yan, M. Kosa, N. Petrutik, N. Tal, A. Aizikovich and M. Gozin, *Dalton Trans.*, 2017, 46, 5994-6002.
5. B. Tan, J. Su, J. Zhang, C. Tang, J. Dou, X. Yang, M. Xu, S. Zeng, W. Li, J. Luan, G. Zhang, S. Song, Q. Zhang, X. Lu, B. Wang and N. Liu, *J. Mater. Chem. A*, 2025, 13, 25103-25109.
6. *Recommendations on the Transport of Dangerous Goods*, United Nations Publication, New York, 2019.
7. C.-j. Zuo and C.-y. Zhang, *Energ. Mater. Front.*, 2025, 6, 189-194.
8. X. Zhou, Z. Wang, H. Huang, Y. Liu, S. Li, W. Qian, S. Huang and J. Xu, *Nat. Commun.*, 2026, 17, 3271.
9. D.-K. Li, W.-S. Dong, H.-Z. Mei, M.-Q. Xu, Z.-J. Lu, Q.-Y. Yu and J.-G. Zhang, *Inorg. Chem. Commun.*, 2026, 184, 115941.
10. C. H. Hou, J. Y. Li, X. R. Jia, J. J. Ma, H. Z. Zhang and Y. H. Luo, *Fuel*, 2025, 391, 134801.
11. Z. T. Chen, Y. Wang, W. T. Ji, X. X. Guo, X. T. Liu, C. Y. Ma, J. J. Guo and Y. Su, *Organic Process Research & Development*, 2024, 28, 3674-3684.
12. J. Zhu, Q. X. Du, S. Y. Xu, X. W. Wu, F. Li and H. Qian, *J. Anal. Appl. Pyrolysis*, 2026, 196, 107700.
13. P. E. Sánchez-Jiménez, L. A. Pérez-Maqueda, A. Perejón and J. M. Criado, *Polymer Degradation and Stability*, 2010, 95, 733-739.
14. S. Bai, D. He, J. Zhao, L. Wang, L. Chen and J. Wang, *FirePhysChem*, 2025, DOI: 10.1016/j.fpc.2025.10.004.
15. M. J. Frisch, G. W. Trucks, H. B. Schlegel, G. E. Scuseria, M. A. Robb, J. R. Cheeseman, G. Scalmani, V. Barone, G. A. Petersson, H. Nakatsuji, X. Li, M. Caricato, A. V. Marenich, J. Bloino, B. G. Janesko, R. Gomperts, B. Mennucci, H. P. Hratchian, J. V. Ortiz, A. F. Izmaylov, J. L. Sonnenberg, Williams, F. Ding, F. Lipparini, F. Egidi, J. Goings, B. Peng, A. Petrone, T. Henderson, D. Ranasinghe, V. G. Zakrzewski, J. Gao, N. Rega, G. Zheng, W. Liang, M. Hada, M. Ehara, K. Toyota, R. Fukuda, J. Hasegawa, M. Ishida, T. Nakajima, Y. Honda, O. Kitao, H. Nakai, T. Vreven, K. Throssell, J. A. M. Jr., J. E. Peralta, F. Ogliaro, M. J. Bearpark, J. J. Heyd, E. N. Brothers, K. N. Kudin, V. N. Staroverov, T. A. Keith, R. Kobayashi, J. Normand, K. Raghavachari, A. P. Rendell, J. C. Burant, S. S. Iyengar, J. Tomasi, M. Cossi, J. M. Millam, M. Klene, C. Adamo, R. Cammi, J. W. Ochterski, R. L. Martin, K. Morokuma, O. Farkas, J. B. Foresman and D. J. Fox, 2016, Gaussian 16 Rev. C.01, Wallingford, CT.
16. A. D. Becke, *The Journal of Chemical Physics*, 1993, 98, 5648-5652.

17. C. T. Lee, W. T. Yang and R. G. Parr, *Physical Review B*, 1988, 37, 785-789.
18. R. Krishnan, J. S. Binkley, R. Seeger and J. A. Pople, *The Journal of Chemical Physics*, 1980, 72, 650-654.
19. S. Grimme, J. Antony, S. Ehrlich and H. Krieg, *Journal of Chemical Physics*, 2010, 132.
20. T. Lu and F. W. Chen, *Journal of Computational Chemistry*, 2012, 33, 580-592.
21. T. Lu, *Journal of Chemical Physics*, 2024, 161, 082503.
22. T. Lu and Q. X. Chen, *Journal of Computational Chemistry*, 2022, 43, 539-555.
23. W. Humphrey, A. Dalke and K. Schulten, *Journal of Molecular Graphics & Modelling*, 1996, 14, 33-38.
